# 1 Extracellular matrix sensing via modulation of orientational order of 2 integrins and F-actin in focal adhesions.

3  
4 Valeriia Grudtsyna<sup>1,2</sup>, Swathi Packirisamy<sup>1</sup>, Tamara Bidone<sup>3</sup>, Vinay Swaminathan<sup>1,4\*</sup>

5  
6 <sup>1</sup> Division of Oncology, Department of Clinical Sciences, Lund University, Lund, Sweden

7 <sup>2</sup> Niels Bohr Institute, University of Copenhagen, Copenhagen, Denmark

8 <sup>3</sup> Department of Biomedical Engineering, The University of Utah, Salt Lake City, UT, USA

9 <sup>4</sup> Wallenberg Centre for Molecular Medicine, Lund University, Sweden

10 \*Correspondence to Vinay Swaminathan: [vinay.swaminathan@med.lu.se](mailto:vinay.swaminathan@med.lu.se)

## 11 Abstract

12  
13  
14 **Specificity of cellular responses to distinct cues from the extracellular matrix (ECM)**  
15 **requires precise and sensitive decoding of information from the cell surface. However,**  
16 **how known mechanisms of mechanosensing such as force dependent catch bonds and**  
17 **conformational changes in focal adhesion (FA) proteins can confer this sensitivity is not**  
18 **known. Using a combination of polarization microscopy and computational modeling,**  
19 **here we identify regulation of orientational order or molecular co-alignment of FA**  
20 **proteins as a mechanism able to precisely tune cell sensitivity to the ECM. We find that**  
21  **$\alpha$ V integrins and F-actin in FAs show changes in orientational order in an ECM-**  
22 **mediated integrin activation dependent manner. This magnitude of orientational order**  
23 **is sensitive to changes in ECM density but independent of myosin-II activity though**  
24 **actomyosin contractility can further fine-tune it. A molecular clutch model for integrin**  
25 **binding ECM ligands demonstrates that orientational order of integrin-ECM binding**  
26 **and catch bonds tune cellular sensitivity to ECM density. This mechanism is also able to**  
27 **decouple ECM density changes from changes in ECM stiffness thus also contributing to**  
28 **specificity. Taken together, our results suggest relative geometric organization of FA**  
29 **components as an important regulator of mechanotransduction.**

## 30 Introduction

31  
32  
33 Cells sense and respond to a wide range of physical cues from the extracellular matrix  
34 (ECM) to regulate processes such as cell migration, proliferation, and transcription[1]–[3].  
35 These cues which include the composition and density of ECM proteins and associated  
36 mechanical properties such as stiffness, viscoelasticity and architecture are converted into  
37 physical signals such as forces and deformation at focal adhesion (FA) sites which are then  
38 transmitted and transduced to intracellular protein networks and downstream pathways via  
39 the process of mechanotransduction[4]–[6]. Forces and deformation as signals from FAs  
40 comprise information about magnitude, direction as well as rates and frequency [7]–[11]. To  
41 decipher these signals with high sensitivity and precision, cells need to be able to sense and  
42 transmit small changes in the magnitude, direction or loading rates along  
43 mechanotransduction pathways while maintaining fidelity of the signal intracellularly.

44  
45 Over the years, a number of mechanotransduction mechanisms have been discovered,  
46 many of which rely on proteins undergoing force-induced changes in their function[12]–[14].  
47 These mechanosensory proteins can modulate their function by exhibiting force-dependent  
48 catch bond behavior with interacting partners or by undergoing conformational changes due  
49 to application of forces which results in altered protein-protein interactions, modifications or  
50 activation[15]–[20]. However, how these mechanisms which primarily rely on forces of  
51 different magnitudes acting across the molecule, confer specificity to different physical  
52 signals from the ECM is not known. In addition, how sensitivity to different properties of

53 physical signals, such as direction and loading rate is exactly sensed and transduced  
54 remains largely unknown.

55

56 Recent studies have shown that physical coupling between these different mechanisms at  
57 FA sites can indeed bestow sensitivity to changes in ECM stiffness [21]–[23]. Additionally,  
58 some catch-bonds in FAs are sensitive to the direction of force acting across the interaction  
59 surface of the binding partners[24], [25]. These results imply that instead of acting in  
60 isolation, mechanosensors form physical circuits along the force transmission pathway and  
61 the relative organization of these molecules with respect to each other as well as with  
62 respect to the direction of force can result in changes in sensitivity to ECM cues and  
63 downstream cellular response.

64

65 We previously showed that the primary ECM receptors, integrins can anisotropically  
66 organize and co-align with each other in FAs of cells upon activation by its ECM ligand[26].  
67 This organization which resembles orientational order of nematic materials is oriented along  
68 the long axis of FA which is also the direction of the force vector at the cell-ECM  
69 interface[27], [28]. Additionally, we observed orientational order of F-actin in FAs correlated  
70 with integrin order. Based on the above, we hypothesized that the relative organization of FA  
71 proteins as well as their degree of alignment relative to each other and the force direction i.e.  
72 the orientational order can underlie ECM sensitivity to different physical cues and  
73 downstream cellular response.

74

## 75 **ECM ligand density tunes cell spread area and YAP localization in MEFs in an** 76 **integrin-dependent manner.**

77

78 We first set out to establish the relationship between physical cues from the ECM and  
79 cellular response in our mouse embryonic fibroblasts (MEFs) cell line. We focused on ECM  
80 density which allows for precise control of integrin activation, is physiologically relevant and  
81 is conducive to high-resolution total internal reflection fluorescence microscopy (TIRF)[29]–  
82 [32]. We plated MEFs for 4 hours on a series of glass bottom dishes adsorbed with varying  
83 concentrations of fibronectin (0.1 ug/ml, 1ug/ml, 10ug/ml) and poly-L-lysine (PLL)(Fig S1a,b).  
84 Fibronectin (FN) binds and activates the  $\beta 1$  and  $\beta 3$  integrin receptors while PLL binds to  
85 cells in an integrin activation independent manner. To measure local as well as distal to FA  
86 cellular response, we focused on the cell spread area, focal adhesion morphology and  
87 nuclear localization of the mechanosensitive transcription factor YAP/TAZ. To directly  
88 compare ECM density sensing with the better characterized stiffness sensing, we also  
89 plated MEFs on polyacrylamide (PA) gels covalently coupled to fibronectin (10 ug/ml) with  
90 Youngs moduli of 0.4, 6 and 60 kPa as previously described[23], [33].

91

92 Immunofluorescence staining showed that overall cell morphology on different FN  
93 concentrations on glass were clearly distinct, with cells spreading poorly with many small,  
94 dispersed focal adhesions and diffused actin and YAP staining on the lowest fibronectin  
95 concentration and PLL similar to the 0.4KPa stiffness PA gels (Figure 1a, Figure S1c).  
96 Increasing ligand density had a similar effect as increasing stiffness, with cells spreading  
97 more, showing distinct actin stress fibers and focal adhesions and clearer nuclear YAP  
98 signal (Figure 1a, S1c).

99

100 Quantification of cell spread area based on the actin staining showed a 2 fold increase per  
101 100-fold increase in ligand density while the nuclear to cytoplasmic YAP ratio showed a 1.54  
102 fold increase over these ligand density range (Figure 1b 1c). Quantification of these  
103 parameters on PA gels showed a slightly higher level of sensitivity to ECM stiffness with cell  
104 area increases by 3.63 from 0.4 to 60KPa and the YAP ratio increasing by 1.85(Figure 1d,  
105 1e). Interestingly, quantification of focal adhesion morphology based on paxillin  
106 immunostaining showed small differences in FA size and eccentricity over the range of

107 ligand densities with only the number of focal adhesions/cells being significant (Figure S1,  
108 S1d, S1e). We verified the generality of these cellular response in a human epithelial cell  
109 line MCF10A as well (Figure S2).

110  
111 These results collectively show that similar to response to changes to ECM stiffness, cells  
112 also respond with high sensitivity to changes in ECM densities in an integrin dependent  
113 manner.

### 114 115 **Cellular response to changes in ECM density correlates with changes in** 116 **integrin activation dependent orientational order of $\alpha$ V integrins and f- actin in** 117 **FAs.**

118  
119 Having previously identified a strong correlation between orientational order of F-actin and  
120  $\alpha$ V integrins[26], we first asked if F-actin order was sensitive to changes in integrin  
121 activation on FN coated surface. To test this, we plated MEFs untreated or pre-treated with 1  
122 mM  $Mn^{2+}$ , a potent enhancer of integrin activation, on 0.1ug/ml FN for 4 hours. Cells were  
123 then fixed and stained with Alexa Fluor 488-phalloidin and paxillin and imaged using the EA-  
124 TIRF system as previously described[26]. Briefly, a polarized excitation is used to illuminate  
125 fluorescent molecules in the sample and the parallel ( $I_{||}$ ) and perpendicular( $I_{\perp}$ ) components  
126 of the emission are separated using a polarized beam splitter. The relative intensities of  
127 these 2 components are then used to calculate fluorescence anisotropy using the formula,  $r =$   
128  $(I_{||} - I_{\perp}) / (I_{||} + 2I_{\perp})$ . For calculating orientational order of the fluorescent molecule in FAs, the  
129 average 'r' in an FA is plotted as a function of the orientation of the FA long axis with respect  
130 to the excitation polarization, across many FAs and cells for a given condition. The  
131 amplitude(A) of the modulation in this relationship is dependent on the fraction of molecules  
132 co-aligned and directly relates to the molecular order parameter determined for actin in  
133 drosophila embryos and the cell membrane[34], [35]. The peak of the modulation in this  
134 relationship gives the average orientation of the dipoles of the fluorescent molecules.

135  
136 EA-TIRFM imaging of the cells showed distinct differences between cells pretreated with  
137  $Mn^{2+}$  compared to untreated cells.  $Mn^{2+}$  pretreatment increased cell spread area and  
138 resulted in more distinct FAs and actin stress fibers compared to the untreated cells (Figure  
139 2a, Figure S2c, S2d)). The paxillin channel was used to segment FAs and the average  
140 anisotropy 'r' of actin was then calculated per FA and plotted as a function of the FA  
141 orientation. Fitting this modulation to a  $\cos^2$  function and extracting the amplitude of  
142 modulation showed that indeed integrin activation with  $Mn^{2+}$  increased actin order by a factor  
143 of 1.78 ( $A=0.119$ ,  $R^2=0.851$ ;  $A=0.212$ ,  $R^2=0.959$ ) (Figure 2b, Figure S3b). Thus, integrin  
144 activation increases the orientational order of actin in FAs and confirms that actin order is  
145 indeed a consequence as well as a sensitive readout of integrin activation in FAs.

146  
147 Next, we asked if ECM ligand density resulted in changes in  $\alpha$ V integrin and F-actin order.  
148 To measure integrin anisotropy, we expressed a constrained-GFP  $\alpha$ V integrin probe which  
149 rotationally constrains the GFP to allow measurement of integrin order (Figure 2b,S3b,S4a,  
150 S4b). The cells on lower FN concentrations showed similar levels of actin and integrin  
151 anisotropy with a narrow dynamic range in all the FAs while cells on higher FN concentration  
152 had a higher dynamic range of integrin and actin anisotropy (Figure 2b, Figure S3, S4). The  
153 fit of the actin anisotropy vs FA orientation data of cells on 10 ug/ml FN showed a 1.84-fold  
154 change in amplitude compared to 0.1ug/ml FN and 1.16-fold change on 1ug/ml FN (Figure  
155 2b, S3b), while the amplitude of integrins across this ECM range changed by a factor of  
156 2.30(Figure S4c). It is important to note that the order parameter for integrins were  
157 substantially lower compared to F-actin at the same FN densities.

158  
159 Thus, taken together, changes in ECM density results in highly sensitive and robust changes  
160 in  $\alpha$ V integrins and F-actin orientational order which is dependent on integrin activation.

161 **Myosin II activity is not required but increases F-actin order and enhances**  
162 **cellular sensitivity to changes in ECM density.**

163  
164 Within a cell, FAs are highly heterogenous in their size, composition, and function[36]. One  
165 of the key regulators of this heterogeneity is the physical coupling between FAs and the  
166 actomyosin network which results in differences in tension acting across a FA[37], [38].  
167 During its lifetime, FAs undergo myosin II mediated changes in protein composition, size,  
168 and protein organization, all of which are critical determinants of its function[37], [39]–[41].  
169 This suggests that myosin II mediated contractility is a key regulator of FA function.  
170 However, it's role in FA-mediated ECM sensing is controversial as studies have shown that  
171 ECM sensing is both dependent [27], [39], [40] and independent [42] of myosin II activity.  
172 Here, we next wanted to investigate if orientational order and ECM density sensing was  
173 mediated by a specific subpopulation of FAs and thus elucidate the role of myosin II in this  
174 organization.

175  
176 As mentioned above, FA size is strongly correlated with myosin II activity with small  
177 adhesions decoupled to contractility and larger FAs coupled to it. So, we re-analyzed our F-  
178 actin order measurements under different conditions of FN density by binning all the FAs  
179 based on 3 sizes (0.1-0.25 $\mu\text{m}^2$ ; 0.25-1 $\mu\text{m}^2$  and 1-20 $\mu\text{m}^2$ ) (Figure 3a). Sizes smaller than  
180 0.1 $\mu\text{m}^2$  precluded accurate orientation assignment and were thus not analyzed. We then  
181 plotted the average 'r' as a function of FA orientation for the 3 different size bins and fit the  
182 modulations to extract F-actin order at each FN density (Figure 3a). Unsurprisingly, this  
183 analysis first revealed that the big FAs (1-20 $\mu\text{m}^2$ ) showed significant differences in F-actin  
184 order between the lowest FN density ( $A=0.154$ ;  $R^2=0.768$ ) compared to medium and highest  
185 FN density ( $A=0.25$ ;  $R^2=0.962$ ) (Figure 3b). However, to our surprise, we also found that the  
186 biggest difference in F-actin order at the different ECM densities was in the smallest  
187 adhesions (0.1-0.25  $\mu\text{m}^2$ ) with an almost 3-fold change between 0.1ug/ml FN and 1 ug/ml  
188 FN and a 5-fold difference between 0.1 to 10 ug/ml FN(Figure 3b). In fact, the  $\cos^2$  fit on the  
189 lowest FN density was very poor ( $R^2=0.268$ ) leading to an unreliable measure of amplitude  
190 and thus suggesting a very disordered actin structure (Figure 3a). Additionally, at the highest  
191 FN density, the difference in order of F-actin in the smallest vs. the biggest FAs was very  
192 small (1.28-fold change;  $A=0.196$ ;  $A=0.25$ ). The middle size bin showed intermediate  
193 differences between the small and big FAs with less differences between 0.1 ug/ml FN and 1  
194 ug/ml FN while a 2-fold change between the small and the biggest FAs. Taken together,  
195 these results show that that the smallest FAs are the most sensitive to changes in ECM  
196 ligand density and that on the highest density, F-actin exhibits orientational order to a similar  
197 extent at all FA sizes.

198  
199 Since FA size correlates with FA maturation state and myosin II activity, our results  
200 suggested that myosin II activity was not required for changes in ECM density dependent F-  
201 actin order. To test this, we plated MEFs on the 3 FN densities and treated cells with the  
202 myosin II inhibitor blebbistatin. Inhibition of myosin II results in loss of all stress fibers and  
203 big FAs and leaves behind small NAs. However, since NAs are often harder to accurately  
204 segment and assign orientation, we washed out the blebbistatin for 5 minutes and then fixed  
205 and stained the cells with AF-488 phalloidin and paxillin to analyze F-actin order. EA-TIRFM  
206 of actin and analysis on the remaining small FAs after blebbistatin washout revealed that  
207 myosin II inhibition resulted in lower F-actin order at all FN densities compared to the  
208 untreated cells from Fig 2 (Figure 3c,3d). However, loss of myosin II activity did not  
209 completely abrogate FN density dependent changes in order as there still was a 2-fold  
210 increase in F-actin order between the 0.1 ug/ml and 10ug/ml (Figure S3a). Thus, ECM  
211 density dependent F-actin order is independent of myosin II activity, though its activity can  
212 increase this order.

213  
214 The above results suggest that cellular response to changes in ECM ligand density is  
215 independent of myosin II activity with potentially a role for myosin II in enhancing sensitivity



216 to these changes. To test this, we plated MEFs on FN coated cover-glass at the 3 densities  
217 and then pretreated the cells with blebbistatin or with DMSO (Figure 4a). We fixed and  
218 stained the cells for either actin to measure cell spread area or with YAP to measure its  
219 nuclear translocation. Quantification and analysis showed an insignificant change in cell  
220 spread area in blebbistatin treated cells compared to the DMSO control over each  
221 concentration of FN (Figure 4b). This led to overall similar sensitivity in cell area across the  
222 different ECM ligand densities. Myosin II inhibition also led to decrease in YAP nuclear  
223 translocation at 0.1ug/ml FN and 10 ug/ml FN, while there was no statistical change at 1  
224 ug/ml FN (Figure 4c). This led to a slight decrease in ECM ligand sensitivity in overall YAP  
225 nuclear translocation with a 1.26-fold change from the lowest to the highest(Figure 4c).

226  
227 Taken together, these results suggest that ECM ligand density dependent changes in  
228 orientational order of F-actin and cellular response is independent of myosin II activity,  
229 though motor activity can increase orientational order and enhance cellular sensitivity.

230

### 231 **Orientational order of FA components increases sensitivity for ECM ligand** 232 **binding by modulating directional catch bonds.**

233

234 We next evaluated what mechanisms underlie the changes in orientational order of F-actin  
235 to enable sensitivity to ECM density independent of myosin II activity. To do so, we extended  
236 our computational model of nascent adhesion assembly based on the molecular-clutch  
237 mechanism [43], [44]. Each clutch in the model was represented as an explicit particle  
238 diffusing on the top surface of two parallel surfaces, with the top surface mimicking the  
239 ventral surface of a cell, and the bottom one mimicking the substrate with randomly  
240 distributed ligands (Figure 5a). Each clutch underwent cycles of diffusion, binding and  
241 unbinding of substrate ligands.

242

243 Since our experiments showed that  $\alpha V$  integrins orientational order increases with increase  
244 in ECM density (Figure S3), we incorporated a probability of integrin activation ( $P_a$ ) that  
245 varies linearly with ECM density, with a minimum of 0.5 at 100 ligands/ $\mu\text{m}^2$  and a maximum  
246 of 1 at 200 ligands/ $\mu\text{m}^2$  (Figure 5c). When integrin was active, the clutch could bind a free  
247 ligand; when integrin was inactive it could only diffuse. When bound to a ligand, each clutch  
248 was also considered bound to the actin cytoskeleton through binding of vinculin to actin (via  
249 talin). While the mechanism by which orientation order of F-actin is established in FAs is  
250 unknown, a previous study has shown that long range F-actin order can be established by  
251 formation of directional catch bonds between vinculin and F-actin [25]. Having explicitly  
252 measured orientational order of F-actin here (Figure 2), we incorporated in the model  
253 changes in F-actin order by using two pathways for clutch unbinding of actin: directional,  
254  $k_{off,1}$ , and non-directional,  $k_{off,2}$  (Figure 5a-b). The directional pathway corresponded to the  
255 one with the highest peak in bond lifetime for the vinculin-actin bond at  $\sim 13$  s (Figure 5b), in  
256 which vinculin forms a bond with actin pulling towards its pointed end. The non-directional  
257 pathway corresponded to the lifetime-force relation with a maximum of  $\sim 3$  s (Figure 5b).  
258 To include changes in orientational order of F-actin, we tuned the probability of clutch  
259 unbinding actin according to the directional unbinding pathway ( $P_{v,1}$ ) and then tested its  
260 importance in mediating ligand sensitivity (Figure 5c). To evaluate how different ECM-  
261 dependent integrin anisotropy could affect adhesion assembly, we tuned the degree by  
262 which  $P_a$  varies with ligands concentration (Figure 5d) and evaluated its effect on the fraction  
263 of ligated clutches. Last, to understand how the combined effects providing orientational  
264 order of FA clutches, ECM-dependent integrin activation and F-actin orientation, affect  
265 sensing of ECM density, we tested how simultaneously varying  $P_{v,1}$ , and  $P_a$ , affected the  
266 average number of ligated clutches (Figure 5e). Varying the maximum  $P_{v,1}$  ( $P_{v,1}$   
267 corresponding to  $n = 200$  ligands/ $\mu\text{m}^2$ ) from 0.5 to 1 (Figure 5c) while maintaining  $P_a = 0.5$ ,  
268 increased the average fraction of ligated clutches from a minimum of  $\sim 0.73$  to a maximum  
269  $\sim 0.93$  using 100 to 200 ligands/ $\mu\text{m}^2$ (Figure 5d). Varying the maximum  $P_a$  ( $P_a$  corresponding

270 to  $n = 200$  ligands/ $\mu\text{m}^2$ ) from 0.5 to 1 (Figure 5c) and varying  $n$  from 100 to 200 ligands/ $\mu\text{m}^2$ ,  
271 while maintaining  $P_{v,1} = 0.5$ , decreased the minimum fraction of ligated clutches to  $\sim 0.71$  and  
272 increased their maximum to  $\sim 0.95$  (Figure 5e).

273

274 Simultaneously varying  $P_a$  and  $P_{v,1}$  from 0.5-1 (Figure 5c) in the same range of ligand  
275 densities resulted in variations of the fraction of ligated clutches from 0.73, up to  $\sim 0.97$   
276 (Figure 5f). The fraction of ligated clutches increased about 1.6% using  $n = 200$  ligands/ $\mu\text{m}^2$   
277 and varying  $P_{v,1}$  from 0.5 to 1, while keeping  $P_a = 0.5$  (Figure 5g). The fraction of ligated  
278 clutches increased by about 4% using  $n = 200$  ligands/ $\mu\text{m}^2$  and varying  $P_a$  from 0.5 to 1,  
279 while keeping  $P_{v,1} = 0.5$  (Figure 5g). By simultaneously increasing both  $P_a$  and  $P_{v,1}$  this  
280 increase in the fraction of ligated clutches was more than 5%. The percentage of short-lived  
281 clutches was lower using  $P_a = P_{v,1} = 1$  than using either  $P_a = 0.5$  or  $P_{v,1} = 0.5$  (Figure S6A),  
282 meaning that clutches were ligated for longer time when FA order was maximized.  
283 Collectively, these results demonstrate that ligand sensitivity increases the most by  
284 increasing both in the probabilities of integrin activation and directional catch bond. By  
285 contrast, by increasing either parameter in isolation narrows the range of the fraction of  
286 ligated clutches, resulting in less sensitivity to ECM density. Therefore, the results from the  
287 model demonstrate that the magnitude of orientational order of actin filaments determine the  
288 precise sensitivity to ECM density through FA unbinding kinetics in an integrin-activation  
289 dependent way.

290

291 We next wondered if ECM density sensing was distinct and independent of ECM stiffness in our  
292 orientational order-based motor clutch model. To do so, we systematically changed the ECM  
293 stiffness from 0.4kPa to 60kPa and plotted the distribution of the fraction of ligated clutches at 3  
294 different ECM ligand densities (100, 110 and 180 ligands/ $\mu\text{m}^2$ ) (Figure 6a). Using 0.4kPa, the  
295 fraction of ligated clutches increased from  $\sim 0.6$  to  $\sim 0.8$ ; using 6 kPa the fraction of ligated  
296 clutches increased from  $\sim 0.7$  to  $\sim 0.95$ , shifting the range of ligand sensitivity upward; using 60  
297 kPa, the fraction of ligated clutches increased from only  $\sim 0.55$  to  $\sim 0.85$ , shifting the range of  
298 ligand sensitivity downward. Surprisingly, ECM density sensing was independent of ECM  
299 stiffness in our model as all stiffnesses shown a response to changes in ligand density. At  
300 different stiffnesses, sensitivity to ECM density also increased the most when  $P_a$  and  $P_{v,1}$  were  
301 increased simultaneously (Figure S6). Interestingly, our model also showed a biphasic response  
302 across different stiffnesses for the same ligand density (Figure 6a). This occurred because when  
303 substrate forces were too high adhesions disassembled instead of stabilizing.

304

305 We tested these predictions of our model by plating MEFs on the 3 different FN densities (0.1-10  
306  $\mu\text{g}/\text{ml}$ ) on PA gels of the 3 stiffnesses used in the model (0.4 KPa, 6 KPa and 60 KPa). We fixed  
307 and immunostained the cells after 4 hours of plating for YAP, actin and nucleus, just as  
308 previously described. Quantification of the cell spread area (Figure 6b) and YAP N/C ratio (Figure  
309 6c) across all these conditions showed a remarkable match with the prediction from the model. At  
310 each ECM rigidity, cell area and nuclear localization of YAP increased with increasing FN density  
311 with different sensitivities. We also observed a biphasic response at the highest ECM density  
312 (10 $\mu\text{g}/\text{ml}$ ) across the 3 rigidities matching the prediction of the model.

313

314 Taken together, these results confirm that ECM dependent changes in orientational order of FA  
315 components and regulation of directional catch bonds provide a robust mechanism for fine tuning  
316 the sensitivity of cells to ECM density, independent of ECM rigidity.

317

## 318 Outlook

319

320 Integrin-based FAs are the primary multimolecular structures that mediate sensing of a wide  
321 range of physical cues from the ECM. At the molecular scale, FAs perform this function by  
322 assembling a network of several functionally different proteins that are functionally and physically  
323 linked[37], [45], [46]. In addition to composition, FA molecular architecture is also highly complex  
324 and thought to be a critical regulator of its function[47]–[49]. The role of multimolecular

325 architecture is even more important if one considers the mechanisms of activation of  
326 mechanosensory molecules essential for FA function. The changes in protein function of  
327 mechanosensors are driven by changes in protein structure or conformation upon application of  
328 forces which expose new binding surfaces or cryptic sites that undergo further modifications.  
329 Owing to physical properties of force such as magnitude and direction, the geometry or  
330 orientation of interactions between forces and proteins is an important factor that can influence  
331 the changes in conformation in protein structure and thus its function[50], [51]. In addition to its  
332 effect on single proteins or cluster of proteins, the relative orientational organization of different  
333 proteins, physically connected across the whole FA or FA-nucleus or FA- other cellular structures  
334 can have an impact on the nature of forces felt by distal proteins and organelles[52]. However,  
335 the link between physical cues from the ECM, molecular organization within the FA and cellular  
336 response has so far been missing.

337  
338 Here, we have shown that FA molecules can exhibit orientational order which most importantly,  
339 changes upon small changes in physical cues from the ECM. Our data on F-actin and integrins in  
340 combination with our previously published data shows that FAs have an anisotropic molecular  
341 architecture that is dynamic and originates at the ECM-integrin interface and extends to the actin  
342 cytoskeleton, which is indirectly connected to integrins. We find that the establishment and  
343 regulation of order does not require myosin II contractility suggesting that forces due to actin  
344 polymerization is sufficient and thus not required for mechanosensing, though contractility can  
345 enhance both order and mechanosensitivity. Currently, the specific mechanism that results in F-  
346 actin order in FAs is unknown. A computational model for directionally asymmetric catch bonds  
347 between vinculin and F-actin has previously shown the establishment long range F-actin  
348 order[25]. In our study, we show that the modulation of orientational order measured here when  
349 linked to the directional catch bond as previously shown can lead to highly sensitive  
350 mechanosensing of ECM cues. However, it is also likely that other mechanisms can contribute to  
351 establishment and regulation of orientational order, which include other directional catch bonds  
352 as well as actin crosslinking proteins that have shown to promote actin order in focal  
353 adhesions[24], [53], [54]. Interestingly, long range order of actin in cells has been previously  
354 shown to play a significant role in modulating ECM dependent changes in its mechanical  
355 properties[55]. While it's tempting to speculate that the origin of this long range order is at FAs via  
356 the mechanism or orientational order discovered here, this and other regulatory mechanisms will  
357 be the subject of future research.

358  
359 Modulation of orientational order also offers an elegant and energetically less expensive  
360 mechanism for enhancing sensitivity to ECM cues compared to recruitment of new proteins to the  
361 FAs and is likely applicable to other subcellular structures as well where previously, order of  
362 protein components have been observed[56], [57]. In addition, these results further emphasize  
363 unique material properties of FAs which seem to resemble liquid-crystalline materials rather than  
364 disordered liquid-like. This may have implication in the assembly and growth of these structures  
365 in the cell as well as in-vitro reconstitution efforts which utilize phase separation  
366 methodologies[58], [59]. Finally, orientational order of load bearing proteins have been observed  
367 across different cell types, length scales and the animal kingdom[60]–[62]. In combination with  
368 the results of this study, this suggests a potentially conserved mechanism where orientational  
369 order is not just the consequence of directional forces but may also be a mechanism that fine  
370 tunes response to the forces across different cell and tissues in our body.

## 371 372 **Methods**

### 373 374 Cell culture and sample preparation

375  
376 Mouse embryonic fibroblasts (MEFs) were cultured in Dulbecco's high glucose modified  
377 eagle medium (Gibco) supplemented with 10% fetal bovine serum (Gibco) and 100 units/ml  
378 Penicillin/Streptomycin (Gibco). Polyacrylamide gels of varying Young's modulus were

379 prepared and functionalized following a previously described protocol [63]. Functionalized  
380 polyacrylamide gels or 35 mm 1.5 glass-bottom dishes (Cellvis) were coated with Poly-L-  
381 lysine (PLL) (Sigma-Aldrich), 0.1, 1 and 10  $\mu\text{g/ml}$  fibronectin (Sigma-Aldrich) for 30 min at  
382 37°C and blocked with 2% Bovine Serum Albumin (Sigma-Aldrich) in PBS for 1hr at 37°C or  
383 at 4°C overnight. Cells were plated on FN/PLL coated glass-bottom dishes or gels for 4h  
384 prior to fixation and immunostaining. The relative change in ECM density was verified by  
385 staining for fibronectin (Figure S1). For blebbistatin washout experiments, cells were allowed  
386 to attach for 2h prior to adding 50 $\mu\text{M}$  blebbistatin or DMSO which was washed out after 2h  
387 for 5min. For integrin activation experiments, cells were plated in the presence of 1mM  $\text{Mn}^{2+}$   
388 for 4h before fixing and staining.

389

## 390 Immunostaining and transfection

391

392 Cells were fixed with 4% paraformaldehyde (Thermo Scientific) in cytoskeletal buffer (CB) (2  
393 mM EGTA, 138 mM KCl, 3 mM MgCl, 10 mM Mes, pH 6.1) for 20 min at 37°C and  
394 permeabilized with 0.5% Triton TX-100 (Sigma-Aldrich) in CB for 5 min at RT. They were  
395 then incubated with 0.1M glycine in CB for 10 min and washed with Tris Buffered Saline  
396 buffer (TBS), once for 5 min and twice for 10 min. Next, the cells were blocked with 2% BSA  
397 in 0.1% tween TBS (TBST) for 1h and immunostained with mouse anti-paxillin IgG1 antibody  
398 (BD Transduction Laboratories 610052) (1:500) overnight at 4°C. The cells were washed  
399 with TBST and incubated with secondary goat anti-mouse IgG Alexa 568 (Invitrogen  
400 A11031) (1:400) and Alexa Fluor 488 Phalloidin (Invitrogen) (1:500) for 2h. Samples were  
401 washed and imaged in TBS or mounted on glass slides with ProLong Glass Antifade  
402 Mountant (Invitrogen).

403

404 For YAP immunostaining and cell area measurements, cells were fixed with 4%  
405 paraformaldehyde in PBS for 15 min at RT, permeabilized with 0.2 % Triton TX-100 in PBS  
406 for 5 min and blocked with 3% BSA in PBS for 45 min. Cells were immunostained with  
407 primary mouse-anti YAP monoclonal IgG2a antibody (Santa Cruz biotechnology sc-101199)  
408 (1:400) in 1% BSA in PBS and incubated at 4°C overnight. Cells were washed with 0.05%  
409 Tween in PBS and incubated for 2h in secondary goat anti-mouse Alexa 568-conjugated IgG  
410 antibody (Life Technologies Corporation), Alexa Fluor 488 Phalloidin (Invitrogen) (1:500) and  
411 nuclear dye Hoechst 350 (33342 Solution, Thermo Scientific) (1:4000). Samples were  
412 washed and imaged in TBS or mounted on glass slides.

413 To measure anisotropy and orientational order of  $\alpha\text{V}$  Integrin,  $\alpha\text{V}$  Integrin-GFP-constrained  
414 plasmid based on previous work was used[26]. Cells were co-transfected using the Neon  
415 Transfection system (Invitrogen MPK5000) with 2500ng of  $\alpha\text{V}$  Integrin-GFP-constrained  
416 plasmid and untagged  $\beta\text{3}$  integrin plasmid at 1500V, 30ms, 1pulse. Transfected cells were  
417 cultured in antibiotic free media for 48h before plating on FN/PLL coated 35 mm 1.5 glass-  
418 bottom dishes for 4h. The cells were fixed and stained for paxillin.

419

## 420 EA-TIRFM, image acquisition

421

422 Images were acquired using total internal reflection fluorescence microscopy (TIRF)  
423 configuration on a Nikon Eclipse Ti microscope with the following available laser lines: 405  
424 nm, 488 nm, 561 nm and 657 nm and Spectra EX (Lumencor). TIRF APO 100x 1.49 N.A.  
425 objective was used for acquiring images. Emission/excitation filters used were: GFP (mirror:  
426 498-537 nm and 565-624nm; excitation: 450-490 nm and 545-555 nm; emission: peak 525  
427 nm, range 30 nm) and mCherry(mirror: 430-470 nm, 501-539 nm and 567-627 nm;  
428 excitation: 395-415 nm, 475-495 nm and 540-560 nm; emission: peak 605nm, range 15 nm)  
429 or Continuous STORM (mirror: 420-481 nm, 497-553 nm, 575-628 nm and 667-792 nm;  
430 excitation: 387-417 nm, 483-494 nm, 557-570 nm and 636-661 nm; emission: 422-478 nm,  
431 502-549 nm, 581-625 nm and 674-786nm).

432



433 A polarized evanescent TIRF wave excited the fluorophores. In the emission pathway, the  
434 emitted light was split into p and s polarization components with a polarization beam splitter  
435 (Laser Beamsplitter zt 561 sprdc), placed into an Optosplit III. The orthogonal images (I<sub>pa</sub>  
436 and I<sub>pe</sub>) were projected onto two separate fields of view, manually aligned and captured with  
437 a Teledyne Photometrics 95B 22mm camera. The polarization of the evanescent field was  
438 verified by measuring the extinction coefficient.

#### 439 EA-TIRFM image analysis

440  
441 All image analysis were performed using Julia (v.1.6.0) and the code is available on request.  
442 The I<sub>pa</sub> and I<sub>pe</sub> images were aligned using QuadDIRECT  
443 (<https://github.com/timholly/QuadDIRECT.jl>). G-factor,  $G = \frac{I_{pa}}{I_{pe}}$  was calculated in conjunction  
444 with every imaging session to correct for polarization bias in the detection system and the  
445 optical path. A low concentration solution of fluorescein (Sigma-Aldrich) in water was imaged  
446 with the same camera settings, using 488 nm LED for excitation [64]. The resulting I<sub>pa</sub> and  
447 I<sub>pe</sub> images were used for G-factor computation.  
448 The fluorescence anisotropy formula,

$$449 \quad r = \frac{I_{pa} - G \cdot I_{pe}}{I_{pa} + 2 \cdot G \cdot I_{pe}}$$

450  
451 was applied to the orthogonal F-actin-phalloidin or const.  $\alpha V$  integrin images to create an  
452 anisotropy heatmap. FAs were segmented from the background subtracted paxillin image  
453 using the “Moments” binarization algorithm from the ImageBinarization.jl package. The FA  
454 mean anisotropy and the angle between the FA long axis and the excitation polarization ( $\theta$ ),  
455 were extracted using in-house packages in Julia. FAs with eccentricity less than 0.9 (and  
456 less than 0.7 in the Bb washout experiments) were filtered out for reliable estimation of FA  
457 long axis orientation.

458  
459 Mean anisotropy values (mean intensities from the anisotropy heatmap) from all FAs,  
460 collected from all cell images within the same condition, were plotted against the  
461 corresponding  $\theta$  angles. The data was binned into 15-degree bins (12 bins in total) and the  
462 mean ‘r’ together with SD were calculated. The following trigonometric function was fitted to  
463 the binned means using the “curve\_fit” function from the LsqFit.jl package:

$$464 \quad r = A \cdot \cos^2(\theta + p) + C$$

465  
466 where r is the fluorescence emission anisotropy; amplitude A is directly related to  
467 orientational order;  $\theta$  is the angle between the FA long axis and the excitation polarization; p  
468 is the phase shift, which defines the average orientation of dipoles in the ensemble of  
469 fluorophores; C is the anisotropy offset due to background. Negative counterclockwise  
470 angles were converted to positive angles.

#### 471 472 Confocal microscopy, calculation of YAP N/C ratio and FA analysis.

473  
474 Images were acquired using a Nikon Confocal A1RHD microscope, with 405 nm, 488 nm,  
475 561 nm, and 640 nm laser lines and equipped with 2 GaAsP PMT (for 488 and 561 lines), 2  
476 PMT (for 405 and 640 lines) and 1 GaAsP PMT for spectral detection. Following objectives  
477 were used for imaging: TIRF APO 100x 1.49 N.A. and Plan Achromal Lambda 60x 1.42  
478 N.A. To capture the entire cell volume z-stacks with 0.6  $\mu$ m step size for cells on glass and  
479 1  $\mu$ m step size for cells on gels were taken (usually 10-20 steps per cell).

480  
481 The maximum projection of the z-stack in YAP channel was background subtracted using  
482 functions “sigma\_clip” and “estimate\_background” provided by the Photometry.jl. Median  
483 filtering was applied to images taken with 100x objective. The nucleus was segmented from  
484 the summed up nuclear channel z-stack and eroded (with five pixels for the images taken  
485

486 with 60x objective and 7 pixels for images taken with 100x objective) to represent the area  
487 with nuclear YAP. The nuclear segment was dilated by 55 (for 60x) or 59 (for 100x) pixels  
488 and subtracted with a nuclear segment dilated by 10 (for 60x) or 14 (for 100x) pixels, to  
489 attain a ring-shaped segment around the nucleus. This way, the transition area between the  
490 nuclear and the cytoplasmic region was excluded. The cell was segmented in the actin  
491 channel to represent the cell spread area. The intersection of the ring-shaped segment and  
492 slightly eroded actin segment represented the area with cytoplasmic YAP. For computation  
493 of N/C YAP ratio the median YAP intensity was divided by the median cytoplasmic YAP  
494 intensity. The entire cytoplasmic area was not used to avoid the contribution of low YAP  
495 counts caused by thin cell edges. The Julia code is available on request.

496  
497 Paxillin images, taken as previously described in TIRF mode, were submitted for analysis to  
498 the online Focal Adhesion Analysis Server (FAAS)[65].  
499

## 500 Molecular clutch model of adhesion assembly

501

502 To understand how the orientational order of actin filaments could enable ligand sensitivity,  
503 we extended our computational model of nascent adhesion assembly at the leading cell  
504 edge. Like previous approaches from us and others[44], [66]–[68], our model was based on  
505 the molecular-clutch mechanisms, in which adhesion clutches intermittently transmit  
506 cytoskeletal force to the substrate and substrate rigidity to the actin flow. Cytoskeletal force  
507 was produced by intracellular myosin motors regulating the actin flow velocity and the  
508 number of engaged clutches. Substrate force regulated the strength of the clutch-ligand  
509 binding, mimicking integrin-fibronectin bonds in terms of lifetime versus force relations.  
510 Cytoskeletal force regulated the strength of the clutch-actin binding, mimicking vinculin-actin  
511 bonds in terms of directional versus non-directional lifetime versus force.

512

513 Each clutch in the model was represented as an explicit single point particle in 3D, that  
514 included integrin and vinculins. Once a clutch bound a substrate ligand, it was considered  
515 also bound to the actin cytoskeleton. The lifetime of the fibronectin and actin bound state of  
516 the clutch depended on the kinetics of the bonds of integrin with substrate ligand and of  
517 vinculins with actin. It has been shown that both integrin–fibronectin bond and vinculin-actin  
518 bond are catch-slip bonds, meaning that their lifetime first increases as a function of force,  
519 then decreases as the force increases further[16], [25].

520

521 Initially, a given number of fibronectin molecules were randomly distributed on a substrate,  
522 to which integrins could bind. The substrate was represented as an isotropic and elastic  
523 material, consisting of a bundle of ideal springs which mimicked ligands.

524 The clutches underwent cycles of diffusion along the top surface of the model mimicking the  
525 ventral membrane of cells, followed by binding, and unbinding of substrate ligands  
526 underneath it (Figure 5a). As clutches bound substrate ligands, they experienced  
527 cytoskeletal force, from vinculins binding actin undergoing retrograde flow, as was seen in  
528 the lamellipodium[69]. The number of vinculin-actin bonds depended on force and varied  
529 between 2 and 11[70]. When a diffusing clutch came in proximity of a free fibronectin, it  
530 established a harmonic interaction, which mimicked binding, with stiffness determined by  
531 substrate rigidity. When either integrin or at least one vinculin were bound, the clutch was  
532 considered engaged. When the clutch was engaged, it transmitted the actin flow to the  
533 substrate and built tension on the bonds. This tension was used to determine the unbinding  
534 rates of vinculins and integrin. Therefore, these clutches governed local balances between  
535 cytoskeletal contractile force and substrate stiffness. When both integrin and all vinculins in  
536 a clutch were unbound, the clutch was free to diffuse, mimicking the free diffusion of integrin  
537 receptors on the ventral surface of cells[71]. The actin flow was modulated by the number of  
538 clutches engaged with the substrate, and the number of molecular motors in the system.  
539 The force on the integrin-fibronectin bonds was also directly proportional to substrate  
540 stiffness. All parameters in the model were based upon available experimental data and

541 previous modeling approaches[72]. We directly incorporated the lifetime vs. force  
542 relationships of integrin–fibronectin and vinculin-actin bonds from atomic force microscopy  
543 and optical trap single-molecule experiments[16], [25]. To account for ligand-dependent  
544 integrin activation we varied the probability of integrin activation,  $P_a$ . To account for different  
545 degrees of actin filaments orientation we systematically varied the probabilities of directional  
546 catch bond for vinculin,  $P_{v1}$ . (Figure 5c). To quantify the amount ligated clutches, we  
547 measured the average fraction of ligated clutches from simulations of 300s.

#### 548 549 Data and code availability

550  
551 All raw data that support the findings and the image analysis codes are available from the  
552 corresponding authors upon request.

#### 553 554 Acknowledgements

555  
556 We thank P Nordenfelt, Amin Doostmohammadi, Martijn Gloerich, Guillaume Jacquemet,  
557 Sebastian Wasserstrom and all the members of laboratory of cell and molecular  
558 mechanobiology (LCMM) for their discussion and support. Johannes Kumra Ahnlide is  
559 specially acknowledged for developing the initial analysis pipeline and all the help in  
560 developing code and maintaining image storage servers. Lund University Bioimaging Centre  
561 (LBIC) at Lund University is gratefully acknowledged for providing experimental resources.  
562 This research was funded by the Knut and Alice Wallenberg foundation (VS, Wallenberg  
563 Centre for Molecular Medicine, Lund);Cancerfonden (VS, 19 0445 Pj, Projekt grant) and the  
564 National Science Foundation (TCB, NSF BMMB 2044394).

#### 565 566 Author contributions

567  
568 VG and VSS conceived the project. VG and SP performed experiments and analysed data.  
569 TCB developed the computational model. VG, SP, TCB and VS wrote the manuscript. VSS  
570 supervised the project.

571  
572  
573  
574  
575  
576  
577  
578  
579  
580  
581  
582  
583  
584  
585  
586  
587  
588  
589  
590  
591  
592  
593  
594

595  
596

## References

- [1] J. D. Humphrey, E. R. Dufresne, and M. A. Schwartz, “Mechanotransduction and extracellular matrix homeostasis,” *Nature Reviews Molecular Cell Biology* 2014 15:12, vol. 15, no. 12, pp. 802–812, Oct. 2014, doi: 10.1038/nrm3896.
- [2] D. A. C. Walma and K. M. Yamada, “The extracellular matrix in development,” *Development*, vol. 147, no. 10, May 2020, doi: 10.1242/DEV.175596/224217.
- [3] O. Chaudhuri, J. Cooper-White, P. A. Janmey, D. J. Mooney, and V. B. Shenoy, “Effects of extracellular matrix viscoelasticity on cellular behaviour,” *Nature* 2020 584:7822, vol. 584, no. 7822, pp. 535–546, Aug. 2020, doi: 10.1038/s41586-020-2612-2.
- [4] Z. Sun, S. S. Guo, and R. Fässler, “Integrin-mediated mechanotransduction,” *Journal of Cell Biology*, vol. 215, no. 4, pp. 445–456, Nov. 2016, doi: 10.1083/JCB.201609037.
- [5] F. Martino, A. R. Perestrelo, V. Vinarský, S. Pagliari, and G. Forte, “Cellular mechanotransduction: From tension to function,” *Frontiers in Physiology*, vol. 9, no. JUL, p. 824, Jul. 2018, doi: 10.3389/FPHYS.2018.00824/BIBTEX.
- [6] K. A. Jansen, P. Atherton, and C. Ballestrem, “Mechanotransduction at the cell-matrix interface,” *Seminars in Cell & Developmental Biology*, vol. 71, pp. 75–83, Nov. 2017, doi: 10.1016/J.SEMCDB.2017.07.027.
- [7] C. C. DuFort, M. J. Paszek, and V. M. Weaver, “Balancing forces: architectural control of mechanotransduction,” *Nature Reviews Molecular Cell Biology*, vol. 12, no. 5, pp. 308–319, May 2011, doi: 10.1038/nrm3112.
- [8] A. Ray and P. P. Provenzano, “Aligned forces: Origins and mechanisms of cancer dissemination guided by extracellular matrix architecture,” *Current Opinion in Cell Biology*, vol. 72, pp. 63–71, Oct. 2021, doi: 10.1016/J.CEB.2021.05.004.
- [9] E. Abu Shah and K. Keren, “Mechanical forces and feedbacks in cell motility,” *Current Opinion in Cell Biology*, vol. 25, no. 5, pp. 550–557, 2013, doi: 10.1016/j.ceb.2013.06.009.
- [10] P. Roca-Cusachs, R. Sunyer, and X. Trepats, “Mechanical guidance of cell migration: Lessons from chemotaxis,” *Current Opinion in Cell Biology*, vol. 25, no. 5, pp. 543–549, 2013, doi: 10.1016/j.ceb.2013.04.010.
- [11] A. Elosegui-Artola, X. Trepats, and P. Roca-Cusachs, “Control of Mechanotransduction by Molecular Clutch Dynamics,” *Trends in Cell Biology*, vol. 28, no. 5, pp. 356–367, May 2018, doi: 10.1016/J.TCB.2018.01.008.
- [12] B. D. Hoffman, C. Grashoff, and M. A. Schwartz, “Dynamic molecular processes mediate cellular mechanotransduction,” *Nature*, vol. 475, no. 7356, pp. 316–323, 2011, doi: 10.1038/nature10316.
- [13] Z. Sun, S. S. Guo, and R. Fässler, “Integrin-mediated mechanotransduction,” *The Journal of Cell Biology*, vol. 215, no. 4, 2016, doi: 10.1083/jcb.201609037.
- [14] V. Swaminathan and M. Gloerich, “Decoding mechanical cues by molecular mechanotransduction,” *Current Opinion in Cell Biology*, vol. 72, pp. 72–80, Oct. 2021, doi: 10.1016/J.CEB.2021.05.006.
- [15] W. Chen, J. Lou, E. A. Evans, and C. Zhu, “Observing force-regulated conformational changes and ligand dissociation from a single integrin on cells,” *J Cell Biol*, vol. 199, no. 3, pp. 497–512, 2012, doi: 10.1083/jcb.201201091.



- [16] F. Kong, A. J. García, a. P. Mould, M. J. Humphries, and C. Zhu, “Demonstration of catch bonds between an integrin and its ligand,” *Journal of Cell Biology*, vol. 185, no. 7, pp. 1275–1284, 2009, doi: 10.1083/jcb.200810002.
- [17] B. T. Marshall, M. Long, J. W. Piper, T. Yago, R. P. McEver, and C. Zhu, “Direct observation of catch bonds involving cell-adhesion molecules,” *Nature*, vol. 423, no. 6936, pp. 190–193, 2003, doi: 10.1038/nature01605.
- [18] A. del Rio, R. Perez-Jimenez, R. Liu, P. Roca-Cusachs, J. M. Fernandez, and M. P. Sheetz, “Stretching single talin rod molecules activates vinculin binding.,” *Science*, vol. 323, no. 5914, pp. 638–641, 2009, doi: 10.1126/science.1162912.
- [19] A. Kumar *et al.*, “Talin tension sensor reveals novel features of focal adhesion force transmission and mechanosensitivity,” *Journal of Cell Biology*, vol. 213, no. 3, pp. 371–383, May 2016, doi: 10.1083/jcb.201510012.
- [20] M. Yao, B. T. Goult, H. Chen, P. Cong, M. P. Sheetz, and J. Yan, “Mechanical activation of vinculin binding to talin locks talin in an unfolded conformation.,” *Sci Rep*, vol. 4, p. 4610, 2014, doi: 10.1038/srep04610.
- [21] N. C. Gauthier and P. Roca-Cusachs, “Mechanosensing at integrin-mediated cell–matrix adhesions: from molecular to integrated mechanisms,” *Current Opinion in Cell Biology*, vol. 50, pp. 20–26, Feb. 2018, doi: 10.1016/J.CEB.2017.12.014.
- [22] S. W. Moore, P. Roca-Cusachs, and M. P. Sheetz, “Stretchy Proteins on Stretchy Substrates: The Important Elements of Integrin-Mediated Rigidity Sensing,” *Developmental Cell*, vol. 19, pp. 194–206, 2010, doi: 10.1016/j.devcel.2010.07.018.
- [23] A. Elosegui-Artola *et al.*, “Mechanical regulation of a molecular clutch defines force transmission and transduction in response to matrix rigidity,” *Nature Cell Biology*, vol. 18, no. 5, pp. 540–548, May 2016, doi: 10.1038/ncb3336.
- [24] L. M. Owen, N. A. Bax, W. I. Weis, and A. R. Dunn, “The C-terminal actin-binding domain of talin forms an asymmetric catch bond with F-actin,” *Proc Natl Acad Sci U S A*, vol. 119, no. 10, Mar. 2022, doi: 10.1073/PNAS.2109329119.
- [25] D. L. Huang, N. A. Bax, C. D. Buckley, W. I. Weis, and A. R. Dunn, “Vinculin forms a directionally asymmetric catch bond with F-actin,” *Science (1979)*, vol. 357, no. 6352, 2017.
- [26] V. Swaminathan *et al.*, “Actin retrograde flow actively aligns and orients ligand-engaged integrins in focal adhesions.,” 2017. doi: 10.1073/pnas.1701136114.
- [27] S. v. Plotnikov, A. M. Pasapera, B. Sabass, and C. M. Waterman, “Force fluctuations within focal adhesions mediate ECM-rigidity sensing to guide directed cell migration,” *Cell*, vol. 151, no. 7, pp. 1513–1527, 2012, doi: 10.1016/j.cell.2012.11.034.
- [28] M. L. Gardel, B. Sabass, L. Ji, G. Danuser, U. S. Schwarz, and C. M. Waterman, “Traction stress in focal adhesions correlates biphasically with actin retrograde flow speed,” *Journal of Cell Biology*, vol. 183, no. 6, pp. 999–1005, 2008, doi: 10.1083/jcb.200810060.
- [29] J. Galon *et al.*, “Type, density, and location of immune cells within human colorectal tumors predict clinical outcome,” *Science (1979)*, vol. 313, no. 5795, pp. 1960–1964, Sep. 2006, doi: 10.1126/SCIENCE.1129139/SUPPL\_FILE/GALON.SOM.PDF.
- [30] P. P. Provenzano *et al.*, “Collagen density promotes mammary tumor initiation and progression,” *BMC Medicine*, vol. 6, no. 1, pp. 1–15, Apr. 2008, doi: 10.1186/1741-7015-6-11/FIGURES/8.
- [31] M. Egeblad, M. G. Rasch, and V. M. Weaver, “Dynamic interplay between the collagen scaffold and tumor evolution,” *Curr Opin Cell Biol*, vol. 22, no. 5, pp. 697–706, Oct. 2010, doi: 10.1016/J.CEB.2010.08.015.
- [32] M. J. Paszek *et al.*, “Tensional homeostasis and the malignant phenotype,” *Cancer Cell*, vol. 8, no. 3, pp. 241–254, 2005, doi: 10.1016/j.ccr.2005.08.010.

- [33] P. W. Oakes, Y. Beckham, J. Stricker, and M. L. Gardel, “Tension is required but not sufficient for focal adhesion maturation without a stress fiber template,” *Journal of Cell Biology*, vol. 196, no. 3, pp. 363–374, 2012, doi: 10.1083/jcb.201107042.
- [34] A. Kress *et al.*, “Mapping the Local Organization of Cell Membranes Using Excitation-Polarization-Resolved Confocal Fluorescence Microscopy,” *Biophysical Journal*, vol. 105, no. 1, pp. 127–136, Jul. 2013, doi: 10.1016/J.BPJ.2013.05.043.
- [35] M. Mavrakakis *et al.*, “Septins promote F-actin ring formation by crosslinking actin filaments into curved bundles,” *Nature Cell Biology* 2014 16:4, vol. 16, no. 4, pp. 322–334, Mar. 2014, doi: 10.1038/ncb2921.
- [36] M. L. Gardel, I. C. Schneider, Y. Aratyn-Schaus, and C. M. Waterman, “Mechanical integration of actin and adhesion dynamics in cell migration.,” *Annu Rev Cell Dev Biol*, vol. 26, pp. 315–333, 2010, doi: 10.1146/annurev.cellbio.011209.122036.
- [37] J.-C. Kuo, X. Han, C.-T. Hsiao, J. R. Yates, and C. M. Waterman, “Analysis of the myosin-II-responsive focal adhesion proteome reveals a role for  $\beta$ -Pix in negative regulation of focal adhesion maturation.,” *Nat Cell Biol*, vol. 13, no. 4, pp. 383–93, 2011, doi: 10.1038/ncb2216.
- [38] G. Giannone *et al.*, “Lamellipodial Actin Mechanically Links Myosin Activity with Adhesion-Site Formation,” *Cell*, vol. 128, no. 3, pp. 561–575, 2007, doi: 10.1016/j.cell.2006.12.039.
- [39] Cl. M. Pasapera AM, Schneider, IC, Rericha E, Schlaepfer DD, Waterman, A. M. Pasapera, I. C. Schneider, E. Rericha, D. D. Schlaepfer, and C. M. Waterman, “Myosin II activity regulates vinculin recruitment to focal adhesions through FAK-mediated paxillin phosphorylation,” *Journal of Cell Biology*, vol. 188, no. 6, pp. 877–890, 2010, doi: 10.1083/jcb.200906012.
- [40] A. M. Pasapera, S. v Plotnikov, R. S. Fischer, L. B. Case, T. T. Egelhoff, and C. M. Waterman, “Rac1-dependent phosphorylation and focal adhesion recruitment of myosin IIA regulates migration and mechanosensing.,” *Curr Biol*, vol. 25, no. 2, pp. 175–86, Jan. 2015, doi: 10.1016/j.cub.2014.11.043.
- [41] L. B. Case *et al.*, “Molecular mechanism of vinculin activation and nanoscale spatial organization in focal adhesions,” *Nature Cell Biology*, pp. 1–10, 2015, doi: 10.1038/ncb3180.
- [42] P. W. Oakes *et al.*, “Lamellipodium is a myosin-independent mechanosensor,” *Proc Natl Acad Sci U S A*, vol. 115, no. 11, pp. 2646–2651, 2018, doi: 10.1073/PNAS.1715869115/SUPPL\_FILE/PNAS.1715869115.SM03.MP4.
- [43] T. C. Bidone, A. v. Skeeters, P. W. Oakes, and G. A. Voth, “Multiscale model of integrin adhesion assembly,” *PLOS Computational Biology*, vol. 15, no. 6, p. e1007077, Jun. 2019, doi: 10.1371/JOURNAL.PCBI.1007077.
- [44] P. W. Oakes *et al.*, “Lamellipodium is a myosin-independent mechanosensor,” *Proc Natl Acad Sci U S A*, vol. 115, no. 11, pp. 2646–2651, 2018, doi: 10.1073/PNAS.1715869115/SUPPL\_FILE/PNAS.1715869115.SM03.MP4.
- [45] E. R. Horton *et al.*, “Definition of a consensus integrin adhesome and its dynamics during adhesion complex assembly and disassembly,” *Nature Cell Biology*, 2015, doi: 10.1038/ncb3257.
- [46] H. B. Schiller and R. Fässler, “Mechanosensitivity and compositional dynamics of cell-matrix adhesions.,” *EMBO Rep*, vol. 14, no. 6, pp. 509–19, 2013, doi: 10.1038/embor.2013.49.
- [47] I. Patla *et al.*, “Dissecting the molecular architecture of integrin adhesion sites by cryo-electron tomography,” *Nature Cell Biology* 2010 12:9, vol. 12, no. 9, pp. 909–915, Aug. 2010, doi: 10.1038/ncb2095.

- [48] H. van Hoorn *et al.*, “The nanoscale architecture of force-bearing focal adhesions,” *Nano Letters*, vol. 14, no. 8, pp. 4257–4262, Aug. 2014, doi: 10.1021/NL5008773/SUPPL\_FILE/NL5008773\_SI\_005.AVI.
- [49] P. Kanchanawong *et al.*, “Nanoscale architecture of integrin-based cell adhesions,” *Nature*, vol. 468, no. 7323, pp. 580–584, 2010, doi: 10.1038/nature09621.
- [50] S. Chakrabarti, M. Hinczewski, and D. Thirumalai, “Plasticity of hydrogen bond networks regulates mechanochemistry of cell adhesion complexes,” *Proc Natl Acad Sci U S A*, vol. 111, no. 25, pp. 9048–9053, Jun. 2014, doi: 10.1073/PNAS.1405384111.
- [51] S. Adhikari, J. Moran, C. Weddle, and M. Hinczewski, “Unraveling the mechanism of the cadherin-catenin-actin catch bond,” *PLOS Computational Biology*, vol. 14, no. 8, p. e1006399, Aug. 2018, doi: 10.1371/JOURNAL.PCBI.1006399.
- [52] A. T. Blanchard and K. Salaita, “Multivalent molecular tension probes as anisotropic mechanosensors: concept and simulation,” *Physical Biology*, vol. 18, no. 3, p. 034001, Mar. 2021, doi: 10.1088/1478-3975/ABD333.
- [53] M. A. Juanes, D. Isnardon, A. Badache, S. Brasselet, M. Mavrikis, and B. L. Goode, “The role of APC-mediated actin assembly in microtubule capture and focal adhesion turnover,” *Journal of Cell Biology*, vol. 218, no. 10, pp. 3415–3435, Oct. 2019, doi: 10.1083/JCB.201904165/VIDEO-4.
- [54] O. Loison *et al.*, “Polarization-resolved microscopy reveals a muscle myosin motor-independent mechanism of molecular actin ordering during sarcomere maturation,” *PLOS Biology*, vol. 16, no. 4, p. e2004718, Apr. 2018, doi: 10.1371/JOURNAL.PBIO.2004718.
- [55] M. Gupta *et al.*, “Adaptive rheology and ordering of cell cytoskeleton govern matrix rigidity sensing,” *Nature Communications*, vol. 6, no. 1, p. 7525, Dec. 2015, doi: 10.1038/ncomms8525.
- [56] A. L. Mattheyses, M. Kampmann, C. E. Atkinson, and S. M. Simon, “Fluorescence anisotropy reveals order and disorder of protein domains in the nuclear pore complex,” *Biophysical Journal*, vol. 99, no. 6, pp. 1706–1717, Sep. 2010, doi: 10.1016/j.bpj.2010.06.075.
- [57] M. Kampmann, C. E. Atkinson, A. L. Mattheyses, and S. M. Simon, “Mapping the orientation of nuclear pore proteins in living cells with polarized fluorescence microscopy,” *Nat Struct Mol Biol*, vol. 18, no. 6, pp. 643–649, 2011, doi: 10.1038/nsmb.2056.
- [58] L. B. Case, M. de Pasquale, L. Henry, and M. K. Rosen, “Synergistic phase separation of two pathways promotes integrin clustering and nascent adhesion formation,” *Elife*, vol. 11, Jan. 2022, doi: 10.7554/ELIFE.72588.
- [59] S. F. Banani *et al.*, “Compositional Control of Phase-Separated Cellular Bodies,” *Cell*, vol. 166, no. 3, pp. 651–663, Jul. 2016, doi: 10.1016/J.CELL.2016.06.010.
- [60] M. Cetera *et al.*, “Epithelial rotation promotes the global alignment of contractile actin bundles during *Drosophila* egg chamber elongation,” *Nature Communications 2014 5:1*, vol. 5, no. 1, pp. 1–12, Nov. 2014, doi: 10.1038/ncomms6511.
- [61] Y. Maroudas-Sacks, L. Garion, L. Shani-Zerbib, A. Livshits, E. Braun, and K. Keren, “Topological defects in the nematic order of actin fibres as organization centres of *Hydra* morphogenesis,” *Nature Physics 2020 17:2*, vol. 17, no. 2, pp. 251–259, Nov. 2020, doi: 10.1038/s41567-020-01083-1.
- [62] D. Volfson, S. Cookson, J. Hastay, and L. S. Tsimring, “Biomechanical ordering of dense cell populations,” *Proc Natl Acad Sci U S A*, vol. 105, no. 40, pp. 15346–15351, Oct. 2008, doi: 10.1073/PNAS.0706805105/SUPPL\_FILE/0706805105SI.PDF.

- [63] J. N. Lakins, A. R. Chin, and V. M. Weaver, “Exploring the Link Between Human Embryonic Stem Cell Organization and Fate Using Tension-Calibrated Extracellular Matrix Functionalized Polyacrylamide Gels,” *Methods in Molecular Biology*, vol. 916, pp. 317–350, 2012, doi: 10.1007/978-1-61779-980-8\_24.
- [64] S. Ghosh, S. Saha, D. Goswami, S. Bilgrami, and S. Mayor, “Dynamic Imaging of Homo-FRET in Live Cells by Fluorescence Anisotropy Microscopy,” 2012, doi: 10.1016/B978-0-12-388448-0.00024-3.
- [65] M. E. Berginski, S. M. Gomez, J. Jones, and K. Yamada, “The Focal Adhesion Analysis Server: a web tool for analyzing focal adhesion dynamics,” *F1000Research* 2013 2:68, vol. 2, p. 68, Mar. 2013, doi: 10.12688/f1000research.2-68.v1.
- [66] A. Macdonald, A. R. Horwitz, and D. A. Lauffenburger, “Kinetic model for lamellipodal actin-integrin ‘clutch’ dynamics.,” *Cell Adh Migr*, vol. 2, no. 2, pp. 95–105, 2008, doi: 10.4161/CAM.2.2.6210/SUPPL\_FILE/KCAM\_A\_10906210\_SM0001.ZIP.
- [67] C. E. Chan and D. J. Odde, “Traction dynamics of filopodia on compliant substrates,” *Science (1979)*, vol. 322, no. 5908, pp. 1687–1691, Dec. 2008, doi: 10.1126/science.1163595.
- [68] A. Elosegui-Artola *et al.*, “Rigidity sensing and adaptation through regulation of integrin types,” *Nature Materials* 2014 13:6, vol. 13, no. 6, pp. 631–637, May 2014, doi: 10.1038/nmat3960.
- [69] A. Ponti, M. Machacek, S. L. Gupton, C. M. Waterman-Storer, and G. Danuser, “Two distinct actin networks drive the protrusion of migrating cells.,” *Science*, vol. 305, no. 5691, pp. 1782–1786, 2004, doi: 10.1126/science.1100533.
- [70] M. Yao *et al.*, “The mechanical response of talin,” *Nature Communications* 2016 7:1, vol. 7, no. 1, pp. 1–11, Jul. 2016, doi: 10.1038/ncomms11966.
- [71] O. Rossier *et al.*, “Integrins  $\beta$ 1 and  $\beta$ 3 exhibit distinct dynamic nanoscale organizations inside focal adhesions,” *Nature Cell Biology*, vol. 14, no. 10, pp. 1057–1067, 2012, doi: 10.1038/ncb2588.
- [72] A. Y. Alexandrova *et al.*, “Comparative dynamics of retrograde actin flow and focal adhesions: Formation of nascent adhesions triggers transition from fast to slow flow,” *PLoS ONE*, vol. 3, no. 9, 2008, doi: 10.1371/journal.pone.0003234.



Figure 1

a)

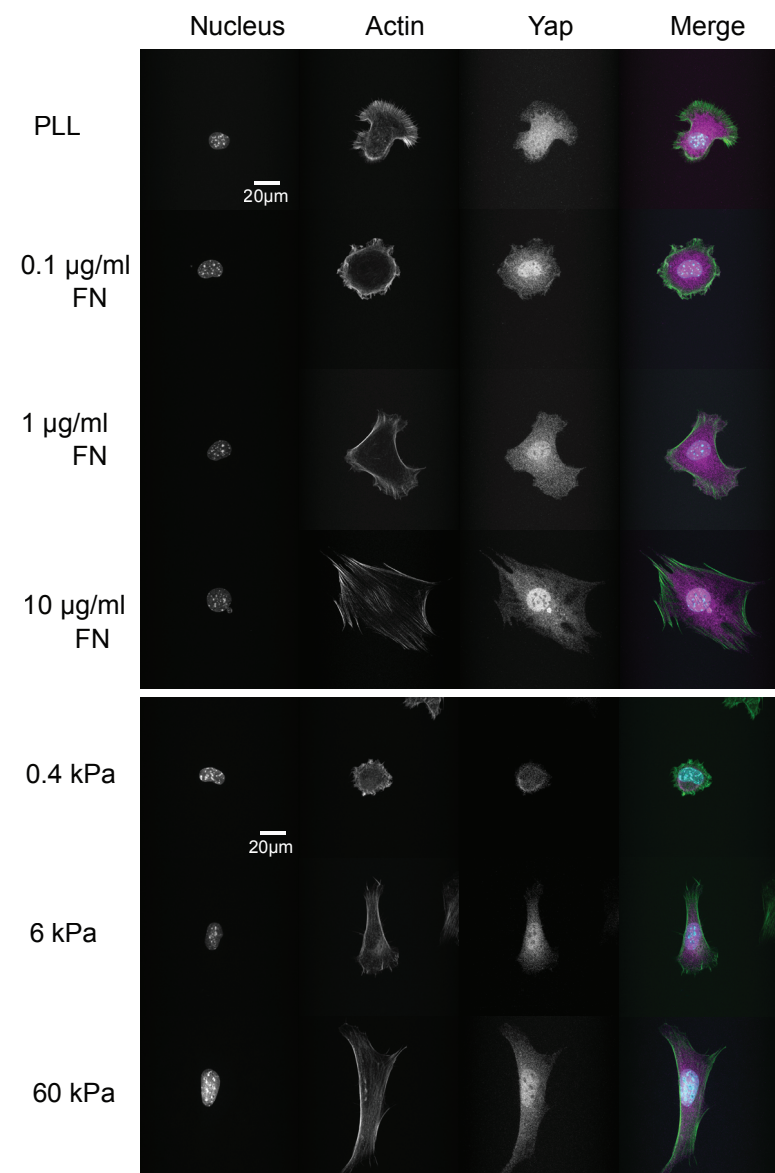

b)

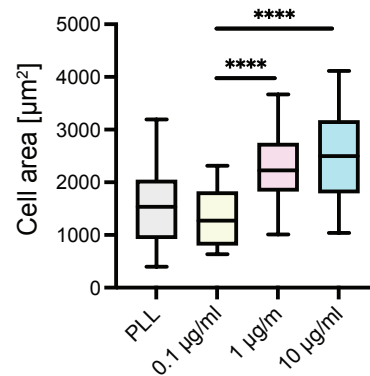

c)

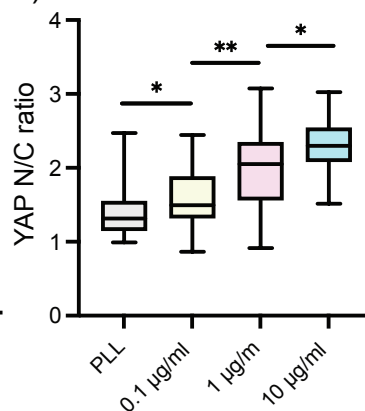

d)

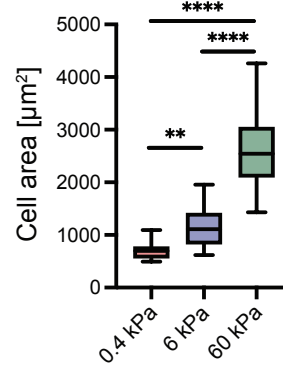

e)

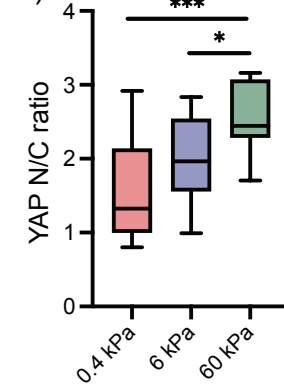

**Figure 1**

ECM ligand density tunes cell spread area and YAP localization in MEFs in an Integrin-dependent manner: (a, top) Representative images of MEFs on glass coated with different FN concentrations (0.1 µg/ml, 1 µg/ml, 10 µg/ml) and PLL, fixed and stained with Hoechst to label nucleus, phalloidin 488 to label actin and Alexa 568 to label YAP. (a, bottom) Representative images of MEFs on gels of different Young's modulus (0.4, 6, and 60 kPa) coated with 10 µg/ml of FN, fixed and stained with Hoechst to label nucleus, phalloidin 488 to label actin and Alexa 568 to label YAP. (b) Box plot quantification of cell area from analysis of immunofluorescence images of cells plated on glass coated with different FN concentrations (0.1 µg/ml, 1 µg/ml, 10 µg/ml) and PLL. Cell area was obtained by segmenting the actin channel. N = 36 for each condition. (c) Box plot quantification of nuclear/cytoplasmic ratio of YAP from analysis of immunofluorescence images of cells plated on glass coated with different FN concentrations (0.1 µg/ml, 1 µg/ml, 10 µg/ml). N = 36 for each condition. (d) Box plot quantification of cell area from analysis of immunofluorescence images of cells plated on gels of varying Young's modulus (0.4, 6, and 60 kPa), coated with 10 µg/ml of FN. Cell area was obtained by segmenting the actin channel. N = 12 for each condition. (e) Box plot quantification of nuclear/cytoplasmic ratio of YAP from analysis of immunofluorescence images of cells plated on gels of varying Young's modulus (0.4, 6, and 60 kPa), coated with 10 µg/ml of FN. N = 12 for each condition.

Figure 2

a)

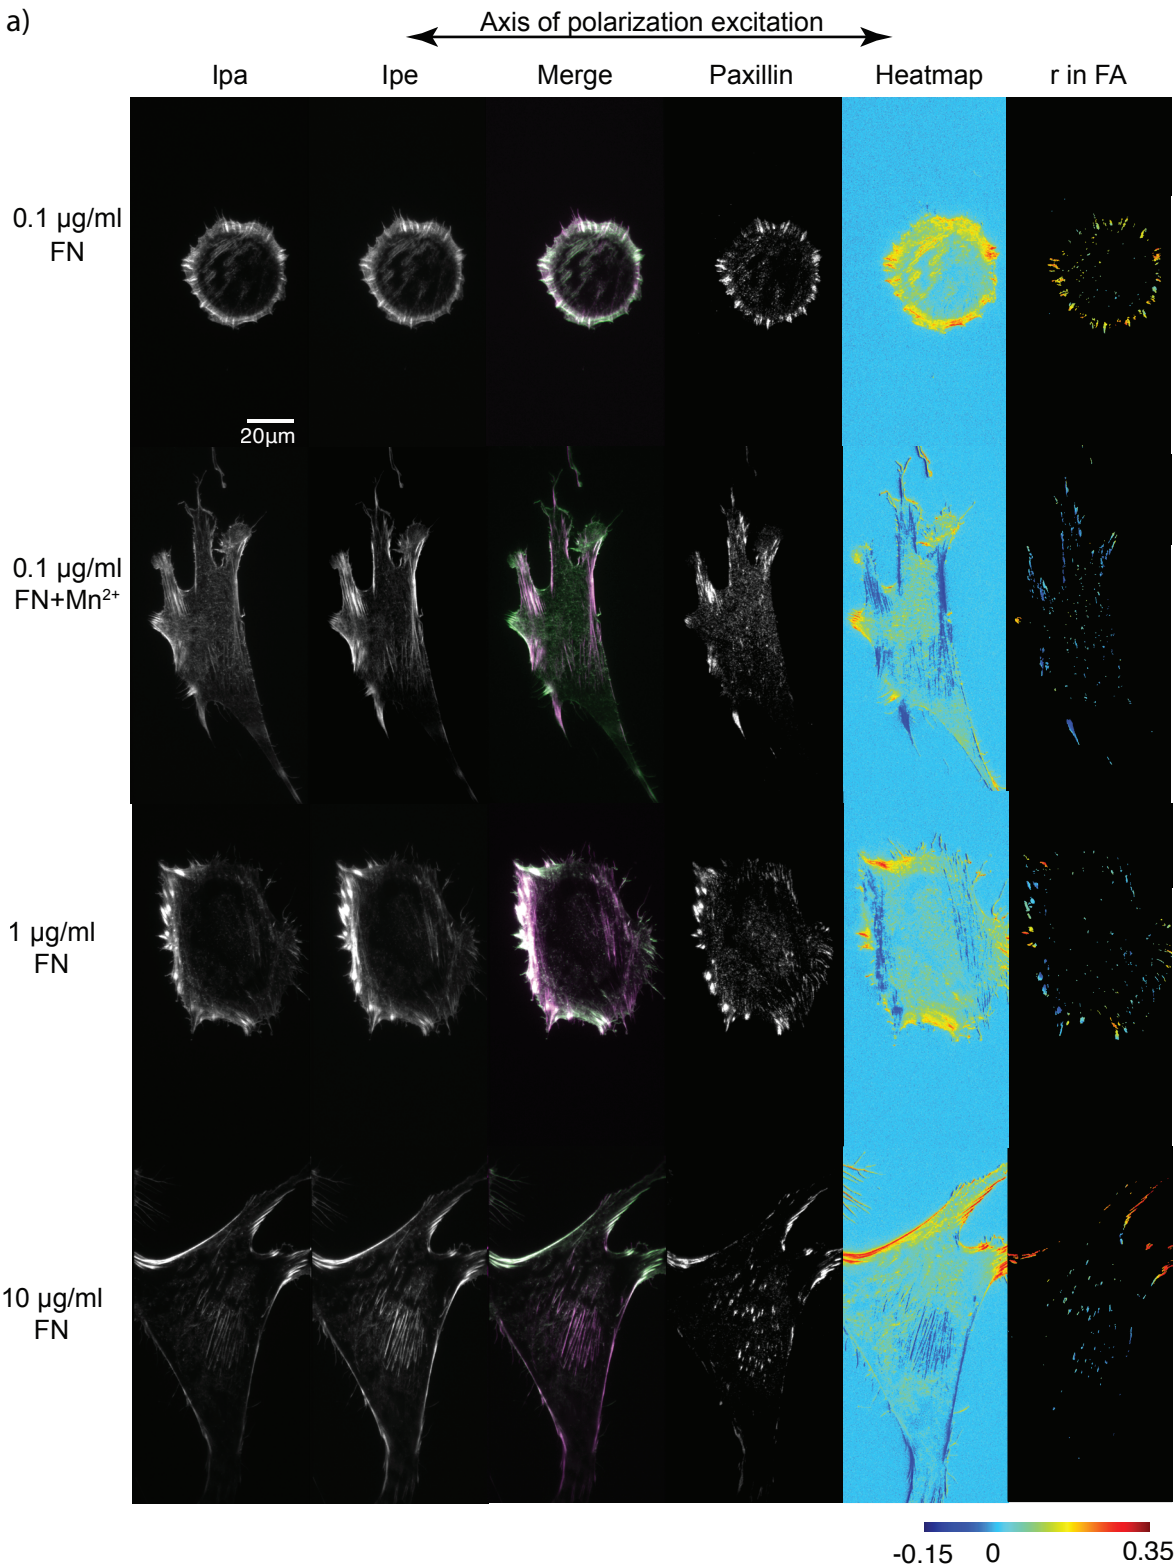

b)

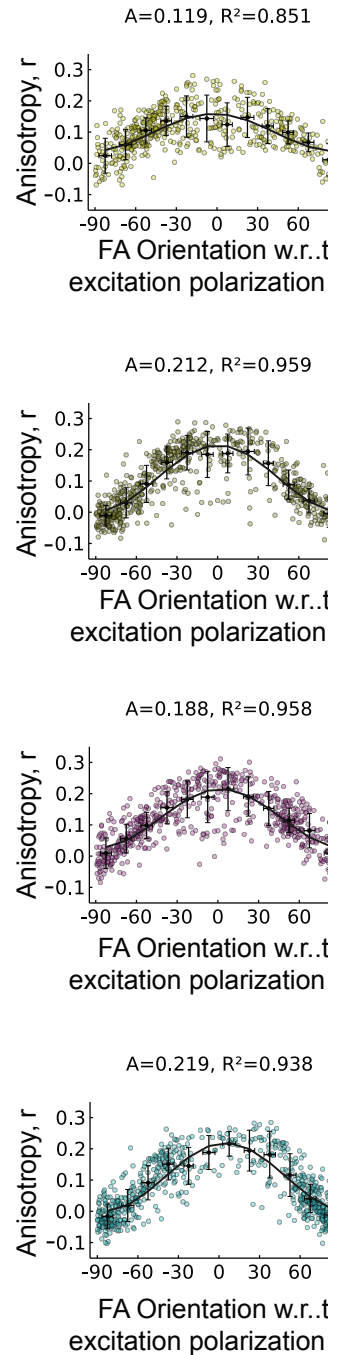

**Figure 2**

Cellular response to changes in ECM ligand density correlates with finely tuned changes in integrin activation and co-alignment of actin in FAs: (a) Representative images of MEFs on glass coated with different FN concentrations (0.1 ug/ml, 1ug/ml, 10ug/ml) and on 0.1 ug/ml FN in the presence of Mn<sup>2+</sup>. Cells were fixed and stained with phalloidin 488 and imaged with TIRF. Emission from the parallel (lpa) channel, perpendicular (lpe) channel and a merge (left, lpa green, lpe magenta) are shown. Paxillin stained with Alexa 568 (middle). Emission anisotropy (r) of actin in the whole cell and emission anisotropy of actin in segmented FAs (Right). Magnitude of anisotropy color scale (bottom) (b) mean actin anisotropy (r) in FAs vs FA orientation fit to the cos<sup>2</sup> function  $r = C + A \cdot \cos^2(\gamma + \theta_0)$  for cells plated on each FN condition. Error bars represent SD. Adhesions from 12 cells were analysed.

Figure 3

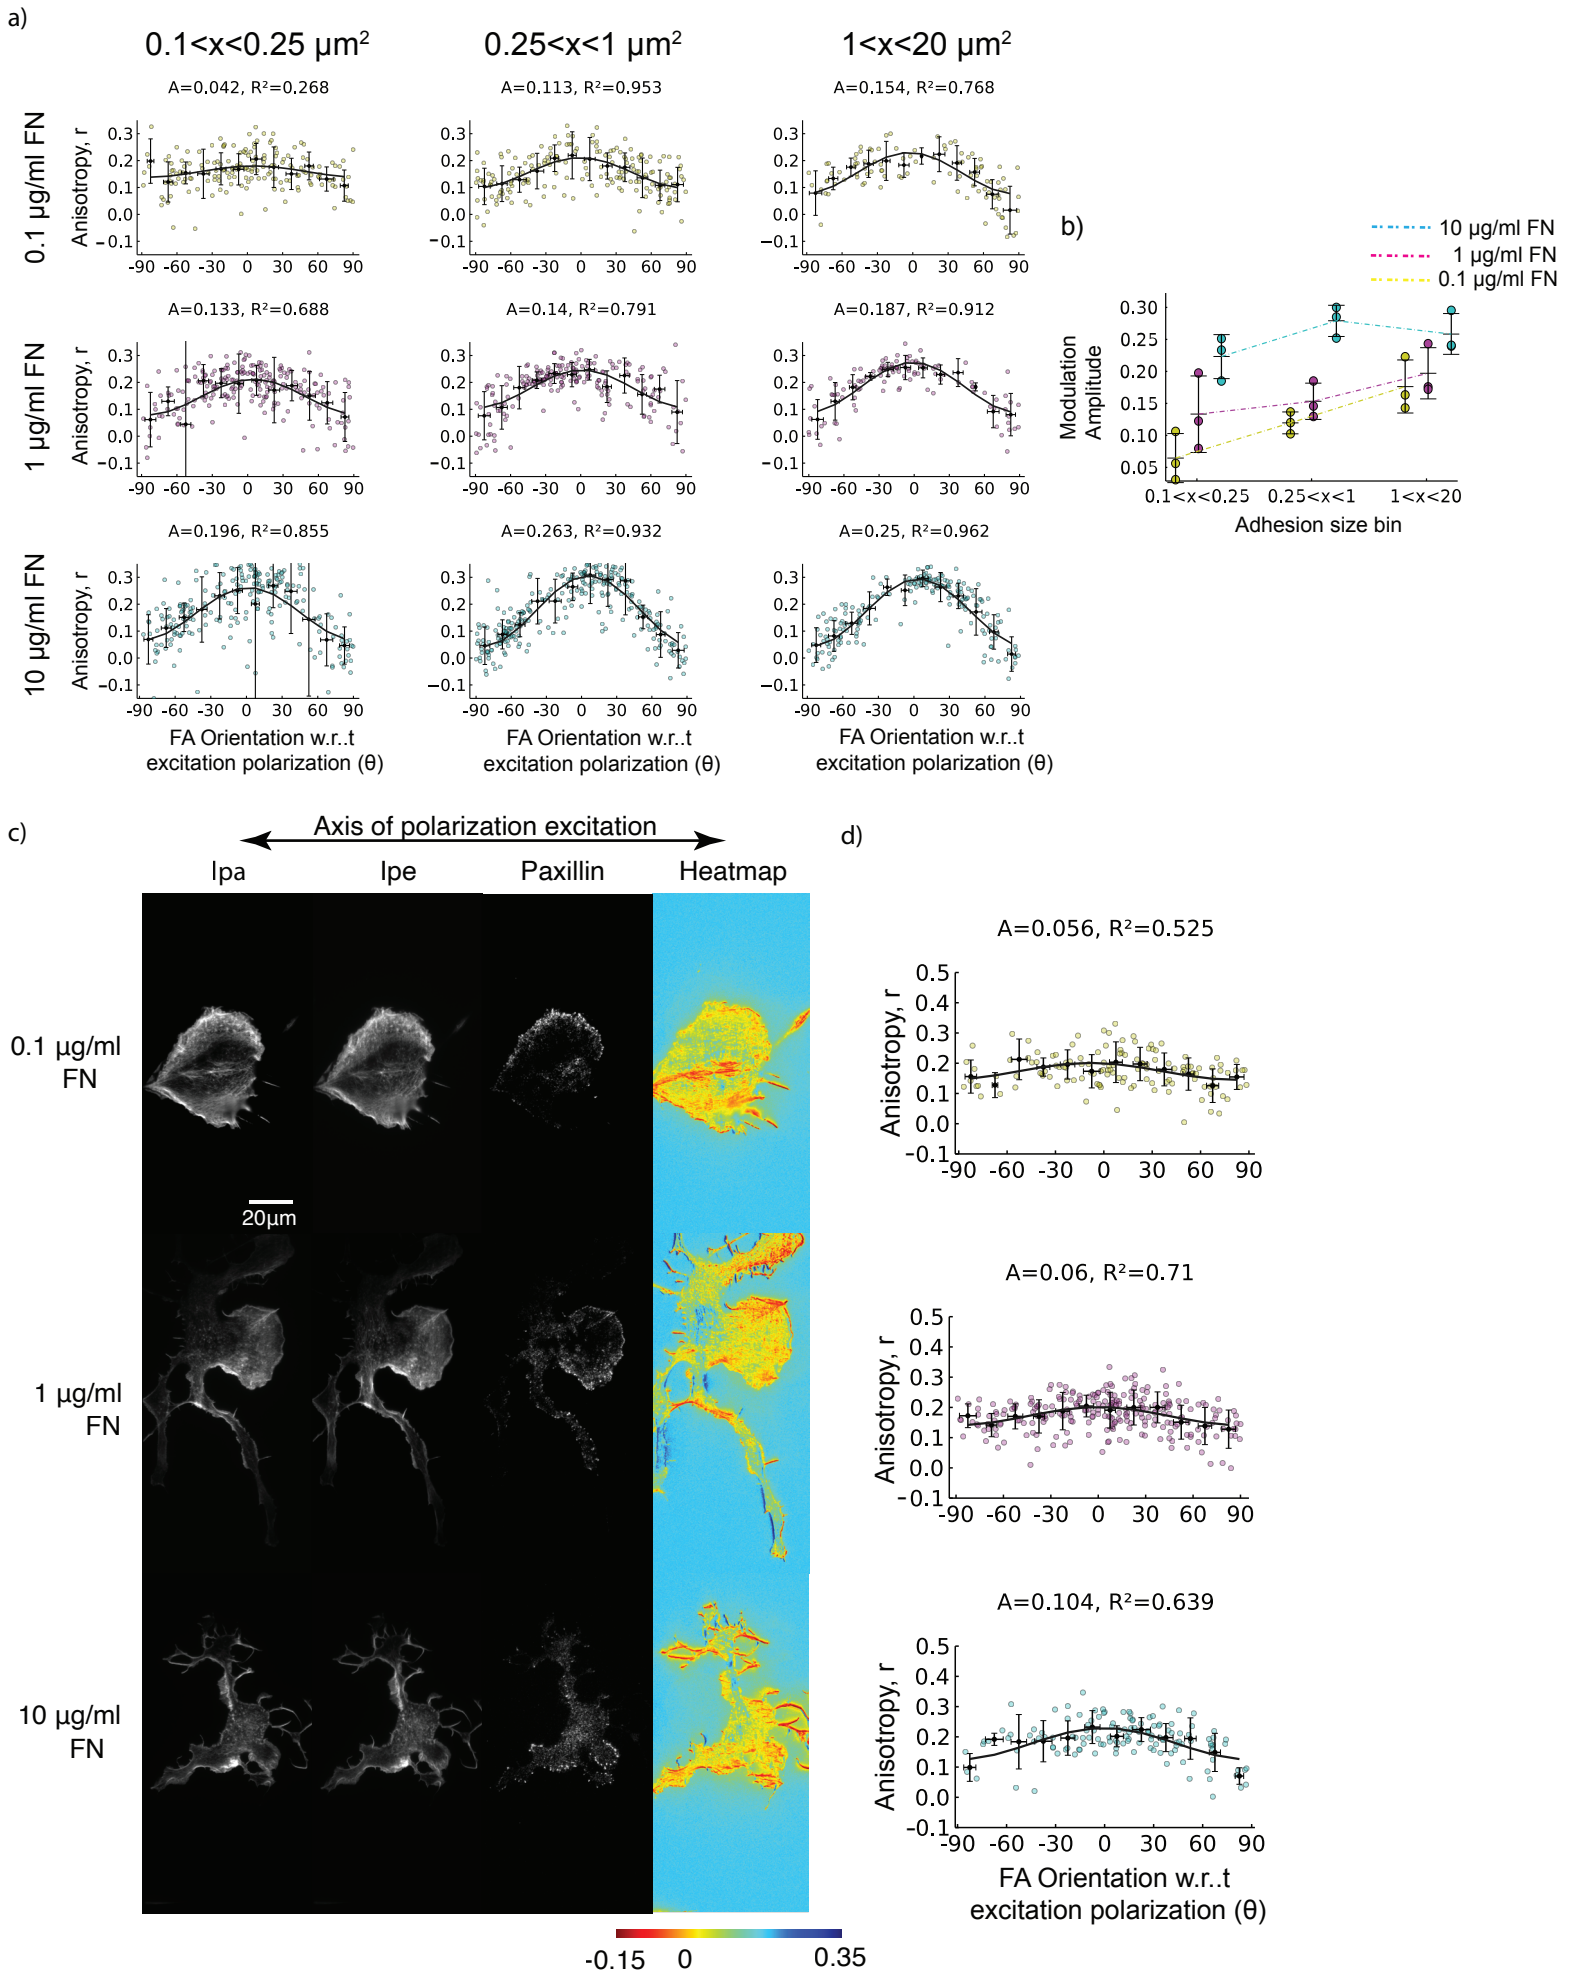



### Figure 3

Myosin-2 activity is not required for but enhances ECM density dependent F-actin co-alignment and cellular response: (a) mean actin anisotropy ( $r$ ) in FAs vs FA orientation fit to the  $\cos^2$  function  $r = C + A \cdot \cos^2(\gamma + \theta_0)$  binned by FA size ( $0.1-0.25\mu\text{m}^2$ ;  $0.25-1\mu\text{m}^2$  and  $1-20\mu\text{m}^2$ ) in cells plated on glass coated with different FN concentrations ( $0.1\text{ ug/ml}$ ,  $1\text{ ug/ml}$ ,  $10\text{ ug/ml}$ ). (b) Graph showing amplitudes of actin anisotropy ( $r$ ) binned by FA size from three experiments. (c) Representative images of MEFs on glass coated with different FN concentrations ( $0.1\text{ ug/ml}$ ,  $1\text{ ug/ml}$ ,  $10\text{ ug/ml}$ ) following blebbistatin washout for 5 minutes. Cells were fixed and stained with phalloidin 488 and imaged with TIRF. Emission from the parallel ( $I_{pa}$ ) channel, perpendicular ( $I_{pe}$ ) channel are shown (left) . Paxillin stained with Alexa 568 (middle right). Emission anisotropy ( $r$ ) of actin stained with phalloidin 488 in the whole cell (right). Magnitude of anisotropy color scale (bottom) (d) mean actin anisotropy ( $r$ ) in FAs vs FA orientation fit to the  $\cos^2$  function for cells plated on glass coated with different FN concentrations ( $0.1\text{ ug/ml}$ ,  $1\text{ ug/ml}$ ,  $10\text{ ug/ml}$ ) with 5 minutes blebbistatin washout. Adhesions from 15, 12 and 10 cells were analysed for the conditions  $0.1\text{ ug/ml}$ ,  $1\text{ ug/ml}$ ,  $10\text{ ug/ml}$  respectively.



Figure 4

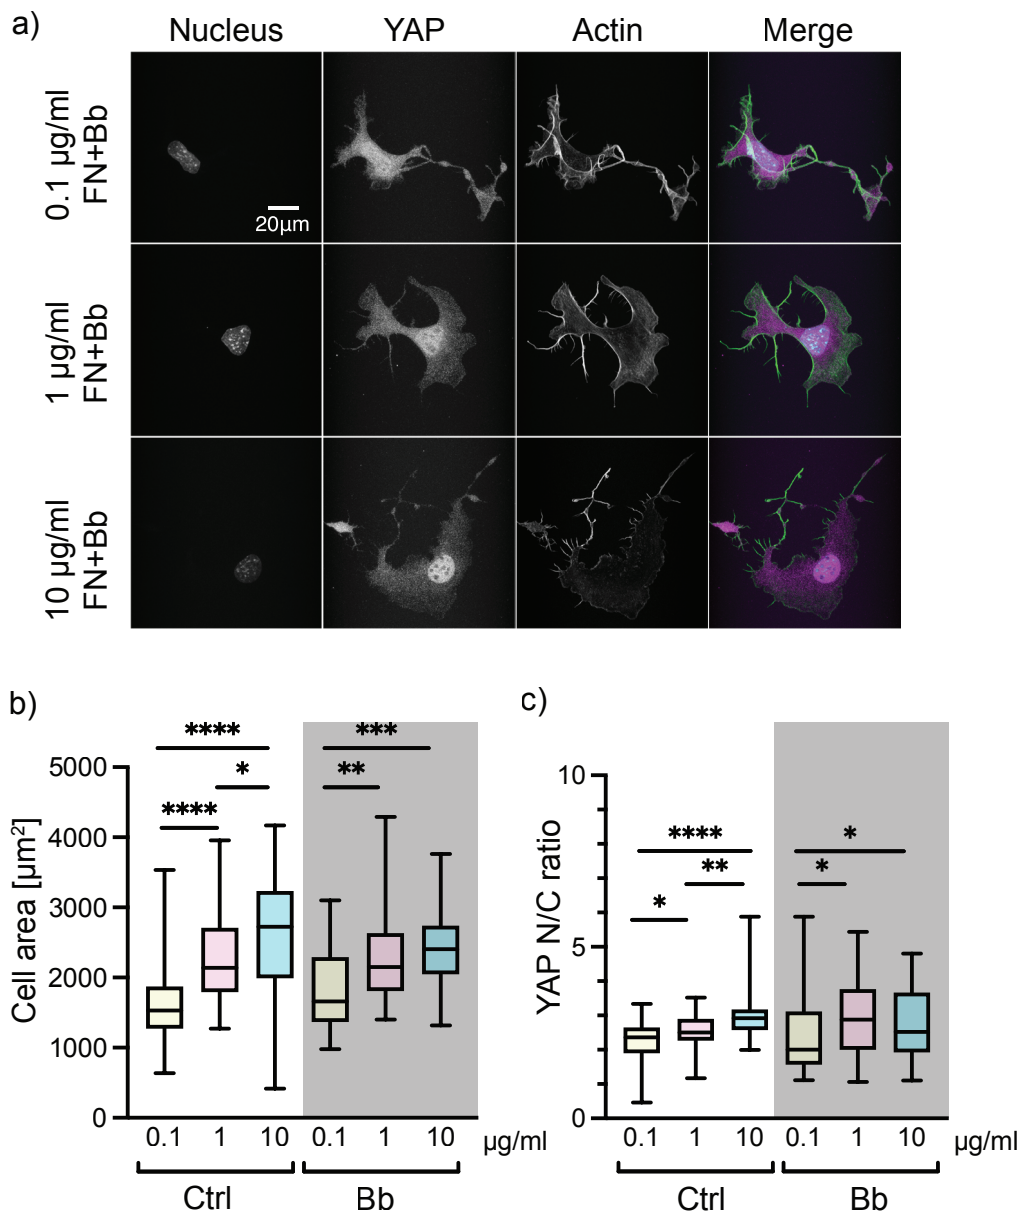

**Figure 4**

F-actin anisotropy in FAs is myosin 2 independent (a) Representative images of MEFs on glass coated with different FN concentrations (0.1 µg/ml, 1 µg/ml, 10 µg/ml) following blebbistatin treatment, fixed and stained with Hoechst to label nucleus, phalloidin 488 to label actin and Alexa 568 to label YAP. (b) Box plot quantification of cell area from analysis of immunofluorescence images of cells plated on glass coated with different FN concentrations (0.1 µg/ml, 1 µg/ml, 10 µg/ml) following blebbistatin treatment. Cell area was obtained by segmenting the actin channel. N = 36 for each condition. (c) Box plot quantification of nuclear/cytoplasmic ratio of YAP from analysis of immunofluorescence images of cells plated on glass coated with different FN concentrations (0.1 µg/ml, 1 µg/ml, 10 µg/ml) following blebbistatin treatment. N = 36 for each condition

Figure 5

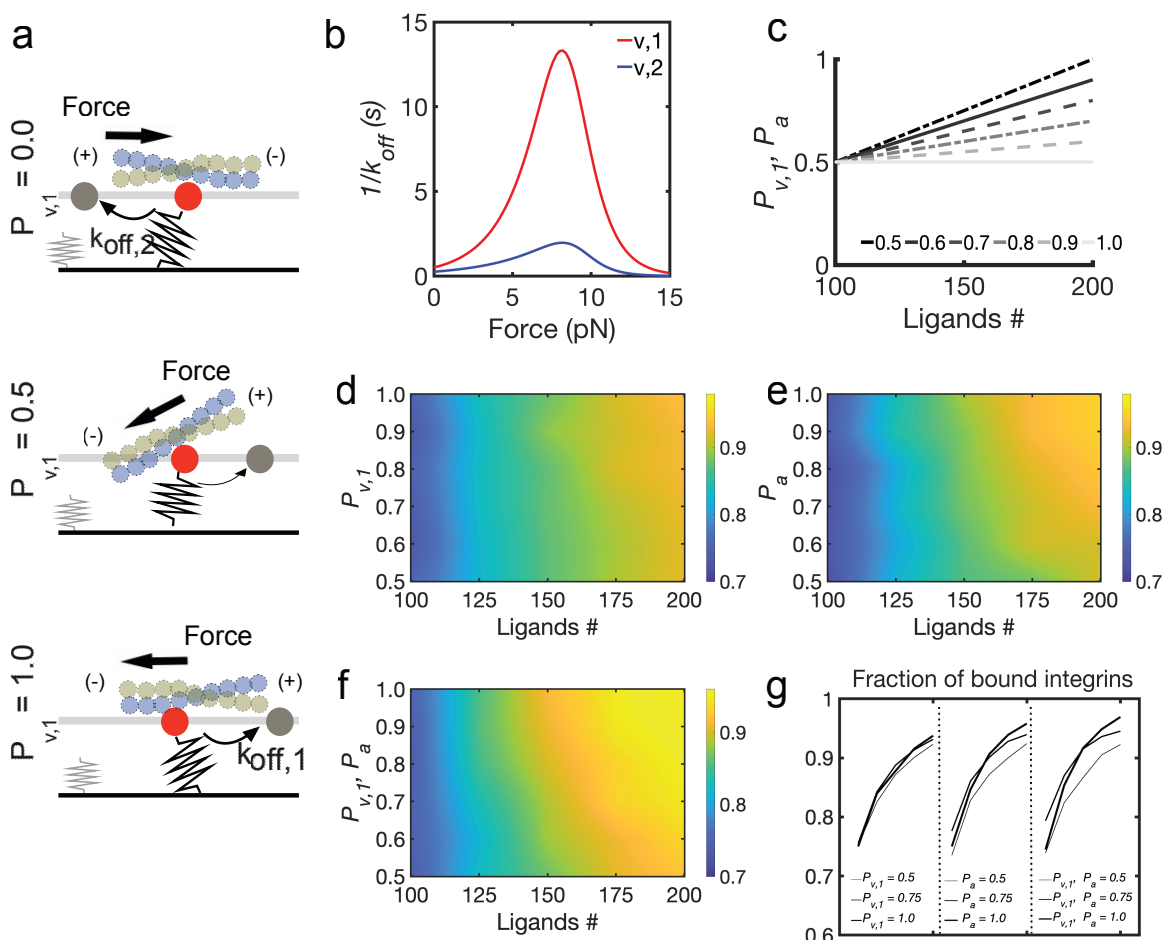

Figure 5

Ligand sensitivity is governed by molecular order of FA clutches. (a) Schematic representation of the computational model of FA assembly based on the molecular clutch mechanism. Two 2D surfaces are placed 20 nm apart. The bottom surface represents the substrate with a random distribution of ligands, modeled as elastic springs with stiffness  $k_{sub}$ , which depends on the substrate young modulus,  $Y$ . The top surface mimics the ventral cell membrane, with integrins diffusing with diffusion coefficient  $D$  and establishing interactions with substrate ligands. When integrin binds a substrate ligand, filaments exert a force on the clutch with magnitude that depends on their retrograde velocity and myosin motors activity. The direction of this force determines the clutch unbinding rate,  $k_{off,1}$  (directional) or  $k_{off,2}$  (non-directional). (b) Unbinding rates follow the lifetime ( $1/k_{off}$ ) versus force relation, where the directional pathway of vinculins in the clutch is indicated with  $v,1$ , and the non-directional pathway is indicated with  $v,2$ . (c) Linear relations between the probability of  $k_{off,1}$  (directional pathway for unbinding)  $P_{v,1}$ , and integrin activation rate,  $P_a$ , with varying ligand density,  $n$ , between 100-200 ligands/ $\mu\text{m}^2$ . Legends indicate the value of  $P_{v,1}$  or  $P_a$  using  $n = 200$ . The following relations are used: for  $P_{v,1}$  or  $P_a = 0.5$  at  $n = 200$ ,  $P_{v,1}$  or  $P_a = 0.0 \times n + 0.5$ ; for  $P_{v,1}$  or  $P_a = 0.6$  at  $n = 200$ ,  $P_{v,1}$  or  $P_a = 0.01 \times n + 0.4$ ; for  $P_{v,1}$  or  $P_a = 0.7$  at  $n = 200$ ,  $P_{v,1}$  or  $P_a = 0.02 \times n + 0.3$ ; for  $P_{v,1}$  or  $P_a = 0.8$  at  $n = 200$ ,  $P_{v,1}$  or  $P_a = 0.03 \times n + 0.2$ ; for  $P_{v,1}$  or  $P_a = 0.9$  at  $n = 200$ ,  $P_{v,1}$  or  $P_a = 0.04 \times n + 0.1$ ; for  $P_{v,1}$  or  $P_a = 1$  at  $n = 200$ ,  $P_{v,1}$  or  $P_a = 0.05 \times n$ ; (d) Average fraction of ligated clutches varying  $P_{v,1}$  between 0.5-1 and  $n$  between 100-200 ligands/ $\mu\text{m}^2$ , while keeping  $P_a = 0.5$ . (e) Average fraction of ligated clutches varying  $P_a$  between 0.5-1 and  $n$  between 100-200 ligands/ $\mu\text{m}^2$ , while keeping  $P_{v,1} = 0.5$ . (f) Average fraction of ligated clutches by simultaneously varying  $P_{v,1}$  and  $P_a$  between 0.5-1 and varying  $n$  between 100-200 ligands/ $\mu\text{m}^2$ . (g) Average fraction of ligand-bound integrins for different values of  $P_{v,1}$ ,  $P_a$  or both, varying  $n$  between 100-200 ligands/ $\mu\text{m}^2$ . All data are obtained as averages from 300 s of simulations for each condition, using  $Y = 6$  KPa.

Figure 6

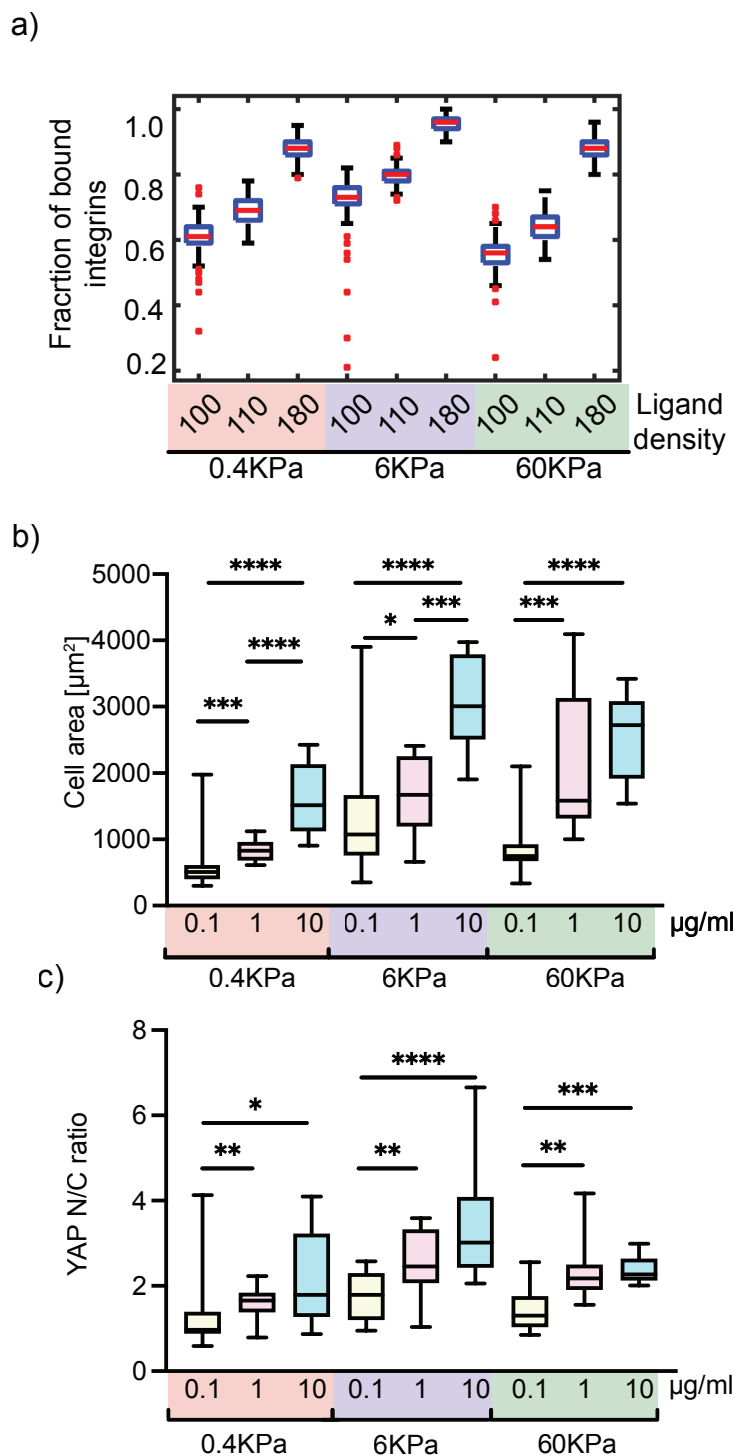

**Figure 6**

ECM ligand sensitivity is ECM stiffness independent: (a) Boxplots of the fraction of ligand bound integrins varying  $n$  between 100-180 ligands/ $\mu\text{m}^2$  and using  $Y = 0.4, 6,$  and  $60$  kPa. All data are obtained from 300 s of simulations sampling every 1 s. (b) Box plot quantification of cell area from analysis of immunofluorescence images of cells plated on gels of varying Young's modulus (0.4, 6, and 60kPa) coated with different FN concentrations (0.1  $\mu\text{g/ml}$ , 1 $\mu\text{g/ml}$ , 10 $\mu\text{g/ml}$ ). Cell area was obtained by segmenting the actin channel.  $N = 12$  for each condition. (c) Box plot quantification of nuclear/cytoplasmic ratio of YAP from analysis of immunofluorescence images of cells plated on gels of varying Young's modulus (0.4, 6, and 60kPa) coated with different FN concentrations (0.1  $\mu\text{g/ml}$ , 1 $\mu\text{g/ml}$ , 10 $\mu\text{g/ml}$ ).  $N = 12$  for each condition

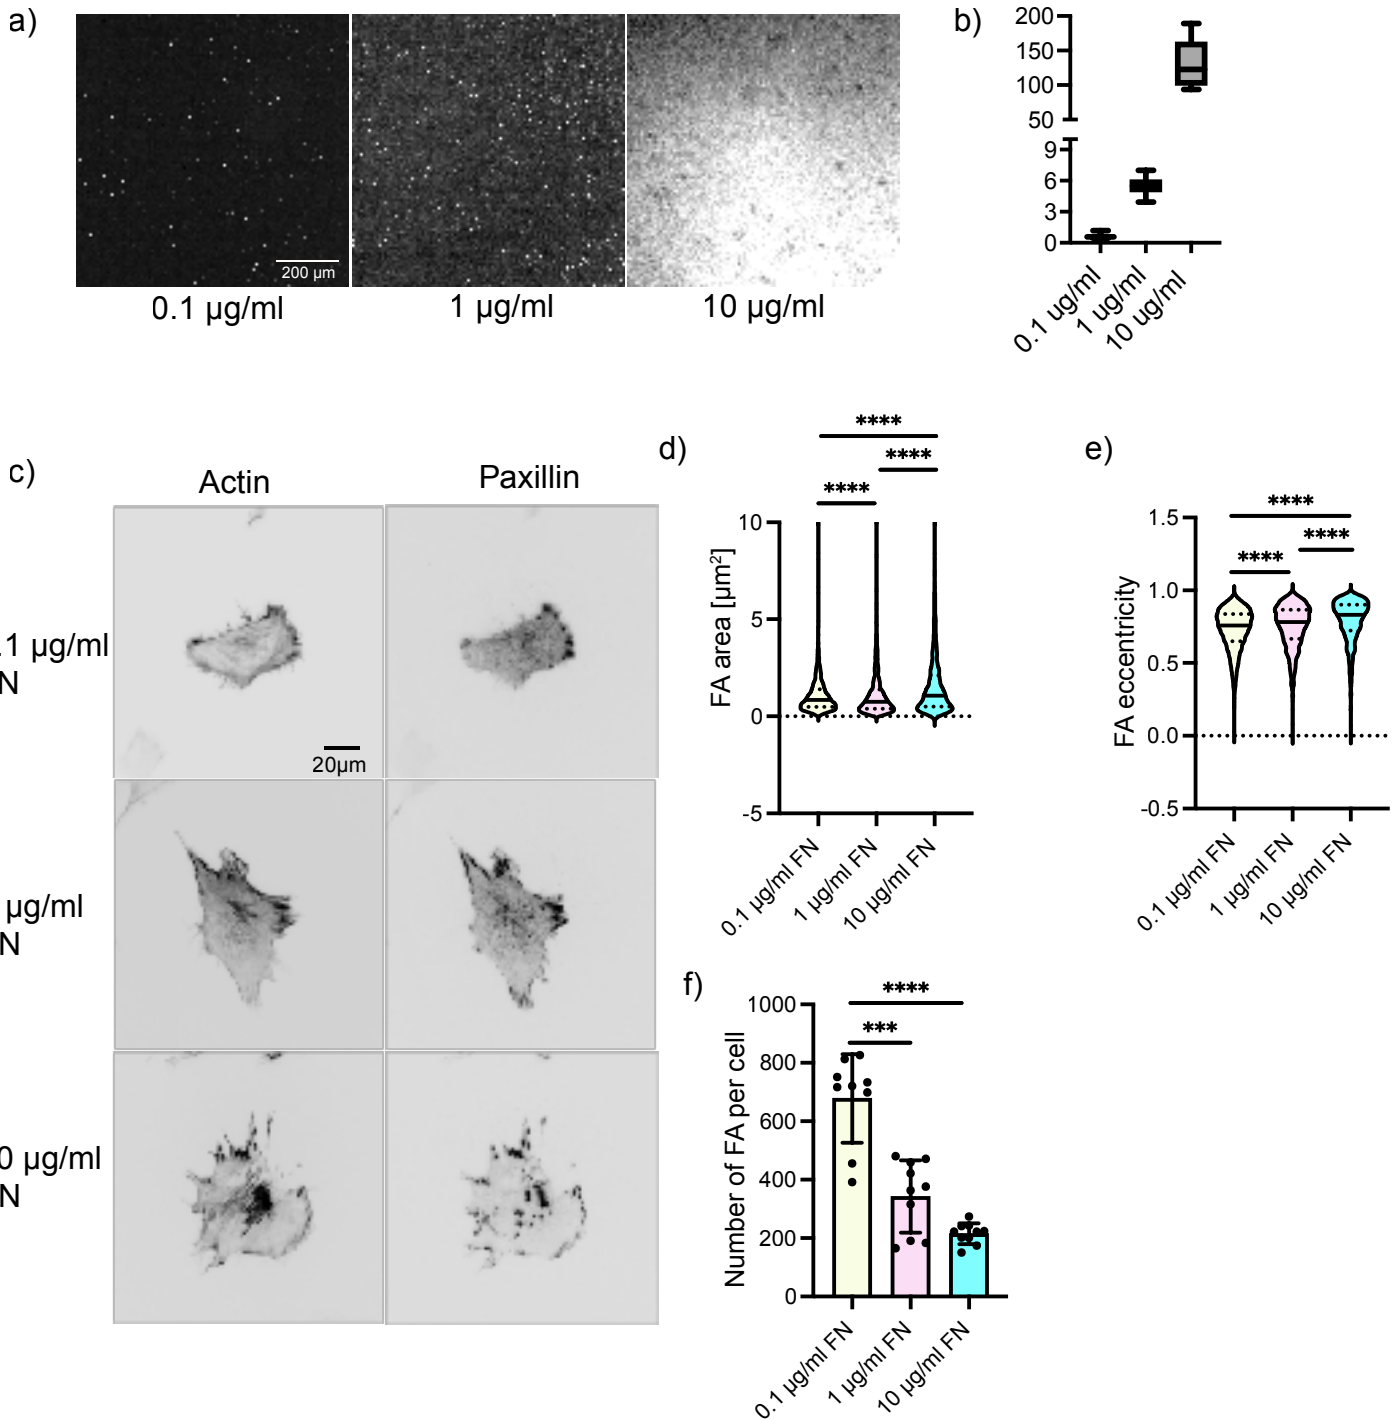

**Figure S1**

(a) Representative images of glass bottom dishes coated with different concentrations of fibronectin (0.1  $\mu\text{g/ml}$ , 1  $\mu\text{g/ml}$ , 10  $\mu\text{g/ml}$ ) (b) box plot of mean fibronectin intensities at the three different concentrations. (c) Representative images of MEFs plated on glass coated with different FN concentrations (0.1  $\mu\text{g/ml}$ , 1  $\mu\text{g/ml}$ , 10  $\mu\text{g/ml}$ ), fixed, and stained with phalloidin 488 to label actin and Alexa 568 to label paxillin. Violin plots of FA area (d) FA eccentricity (e) and box plot of number of FA per cell (f) in MEFs plated on glass coated with different FN concentrations (0.1  $\mu\text{g/ml}$ , 1  $\mu\text{g/ml}$ , 10  $\mu\text{g/ml}$ ). Quantifications were from analysis of immunofluorescence images of paxillin. N = 10 for each condition.



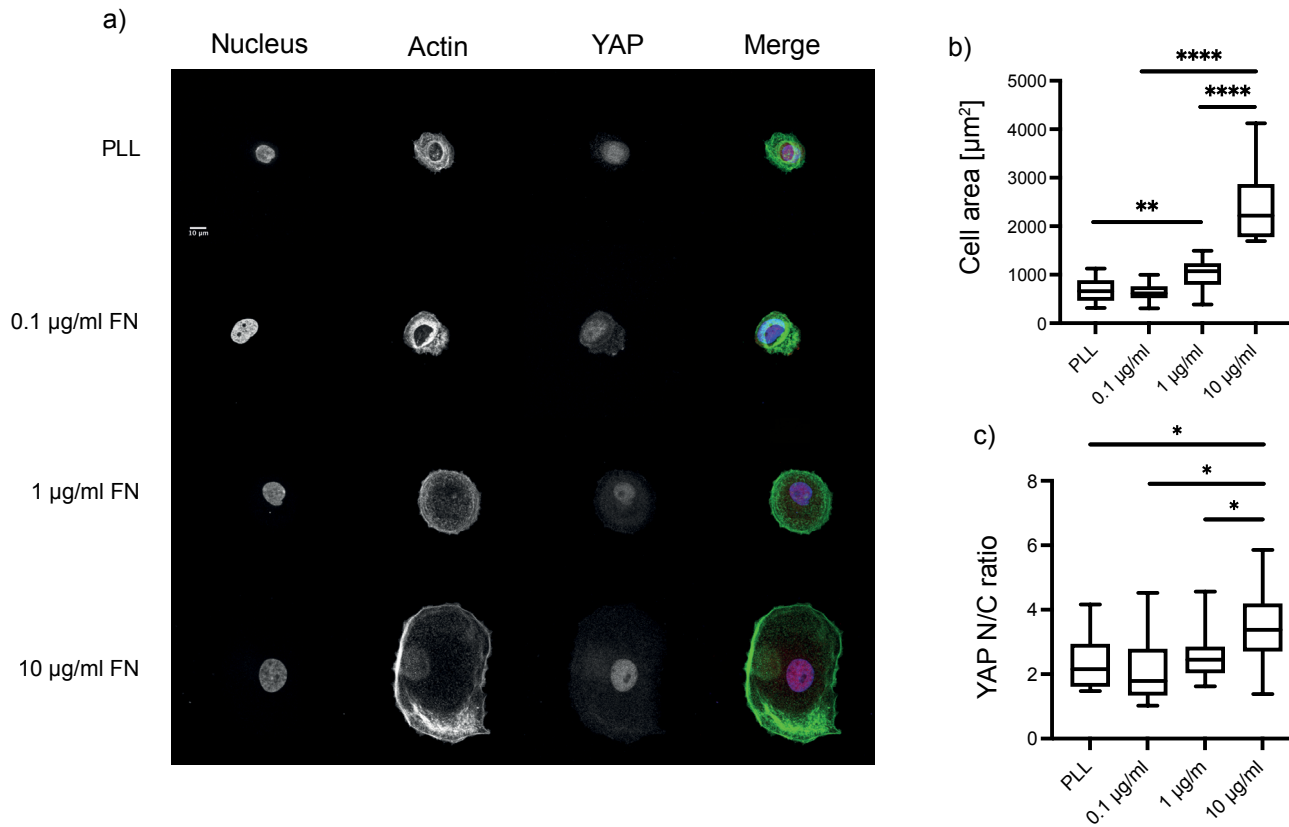

**Figure S2**

(a) Representative images of MCF10a cells plated on glass coated with different FN concentrations (0.1 µg/ml, 1 µg/ml, 10 µg/ml), fixed and stained with Hoechst to stain nucleus, phalloidin 488 to label actin and Alexa 568 to label YAP. (b) Box plot quantification of cell area of MCF10a cells from analysis of immunofluorescence images of cells plated on glass coated with different FN concentrations (0.1 µg/ml, 1 µg/ml, 10 µg/ml) and PLL. Cell area was obtained by segmenting the actin channel. N = 13 for each condition. (c) Box plot quantification of nuclear/cytoplasmic ratio of YAP of MCF10a cells from analysis of immunofluorescence images of cells plated on glass coated with different FN concentrations (0.1 µg/ml, 1 µg/ml, 10 µg/ml) and PLL. N = 13 for each condition.

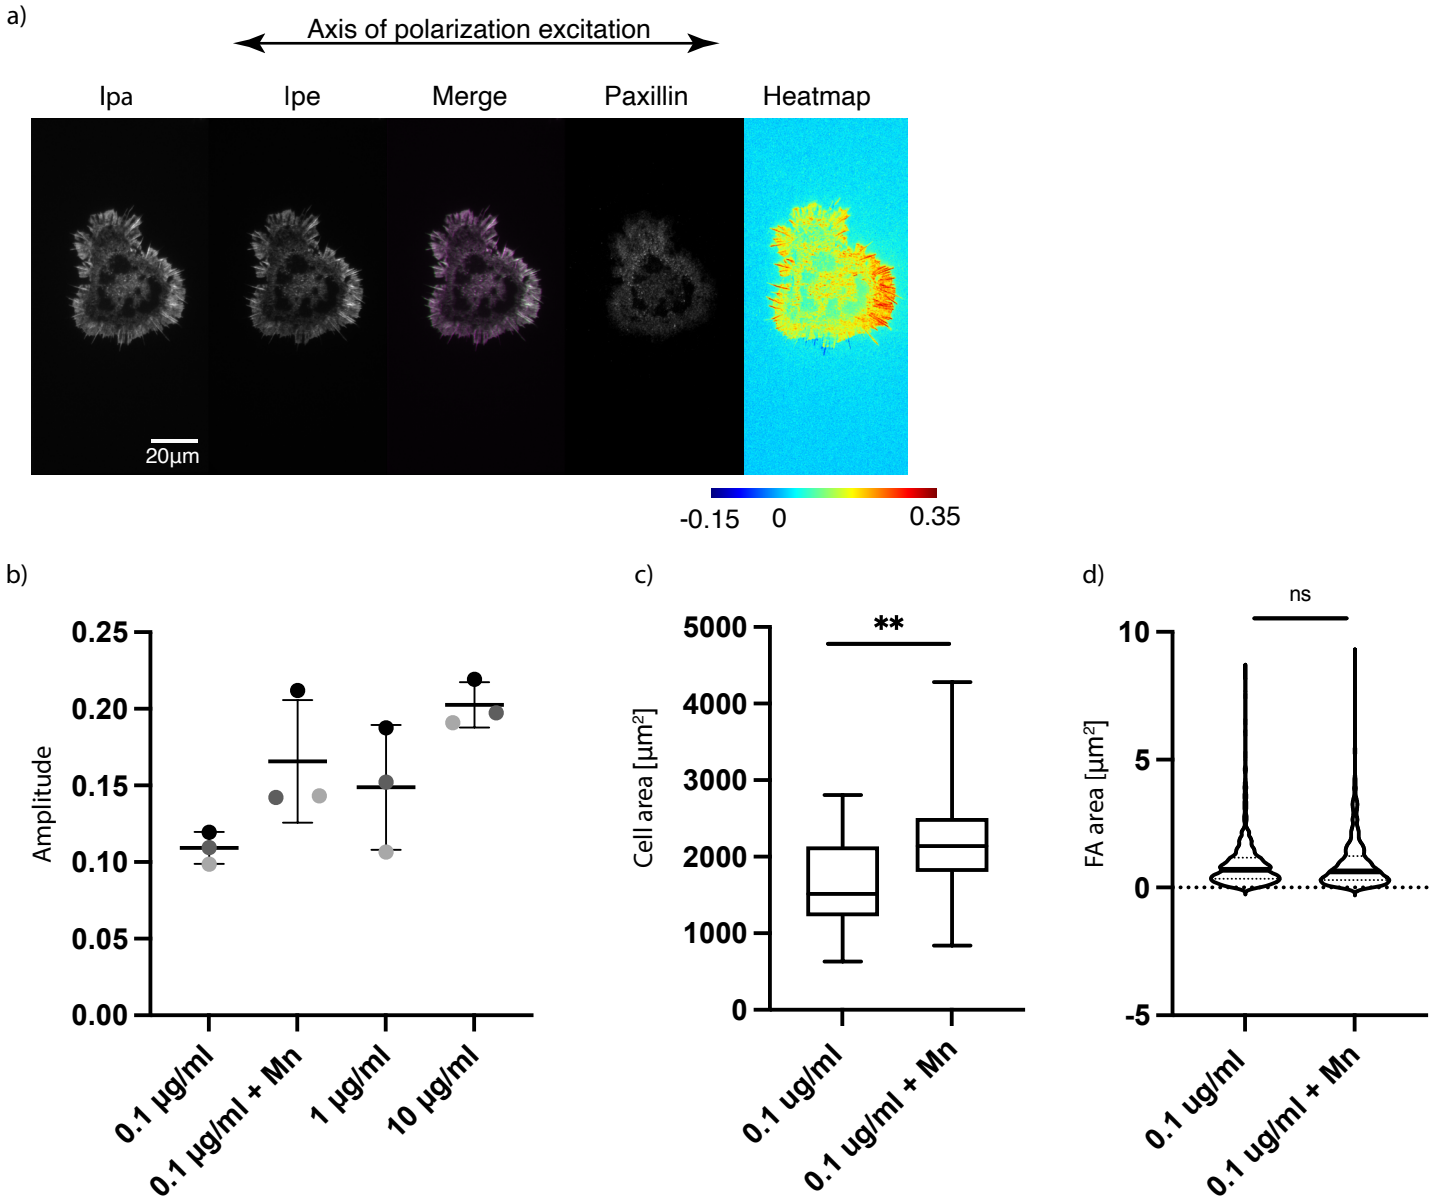

**Figure S3**

(a) Representative images of MEFs plated on glass coated with PLL. Immunofluorescence images of phalloidin 488 actin with emission from the parallel (lpa) and perpendicular (lpe) channels and merge are shown. Paxillin stained with Alexa 568 (middle). Emission anisotropy ( $r$ ) of actin stained with phalloidin 488 in the whole cell is shown (right). (b) Graph showing amplitudes of actin anisotropy ( $r$ ) in cells plated on glass coated with different FN concentrations (0.1  $\mu\text{g/ml}$ , 1 $\mu\text{g/ml}$ , 10 $\mu\text{g/ml}$ ) and in the presence of  $\text{Mn}^{2+}$  on 0.1  $\mu\text{g/ml}$  of FN from 3 experiments. (c) Box plot quantification of cell area from analysis of immunofluorescence images of cells plated on glass coated with 0.1  $\mu\text{g/ml}$  of FN and in presence or absence of  $\text{Mn}^{2+}$ . Cell area was obtained by segmenting the actin channel.  $N = 36$  for each condition. (d) Violin plot quantification of nuclear/cytoplasmic ratio of YAP from analysis of immunofluorescence images of cells plated on glass coated with 0.1  $\mu\text{g/ml}$  of FN and in presence or absence of  $\text{Mn}^{2+}$ .  $N = 12$  for each condition.

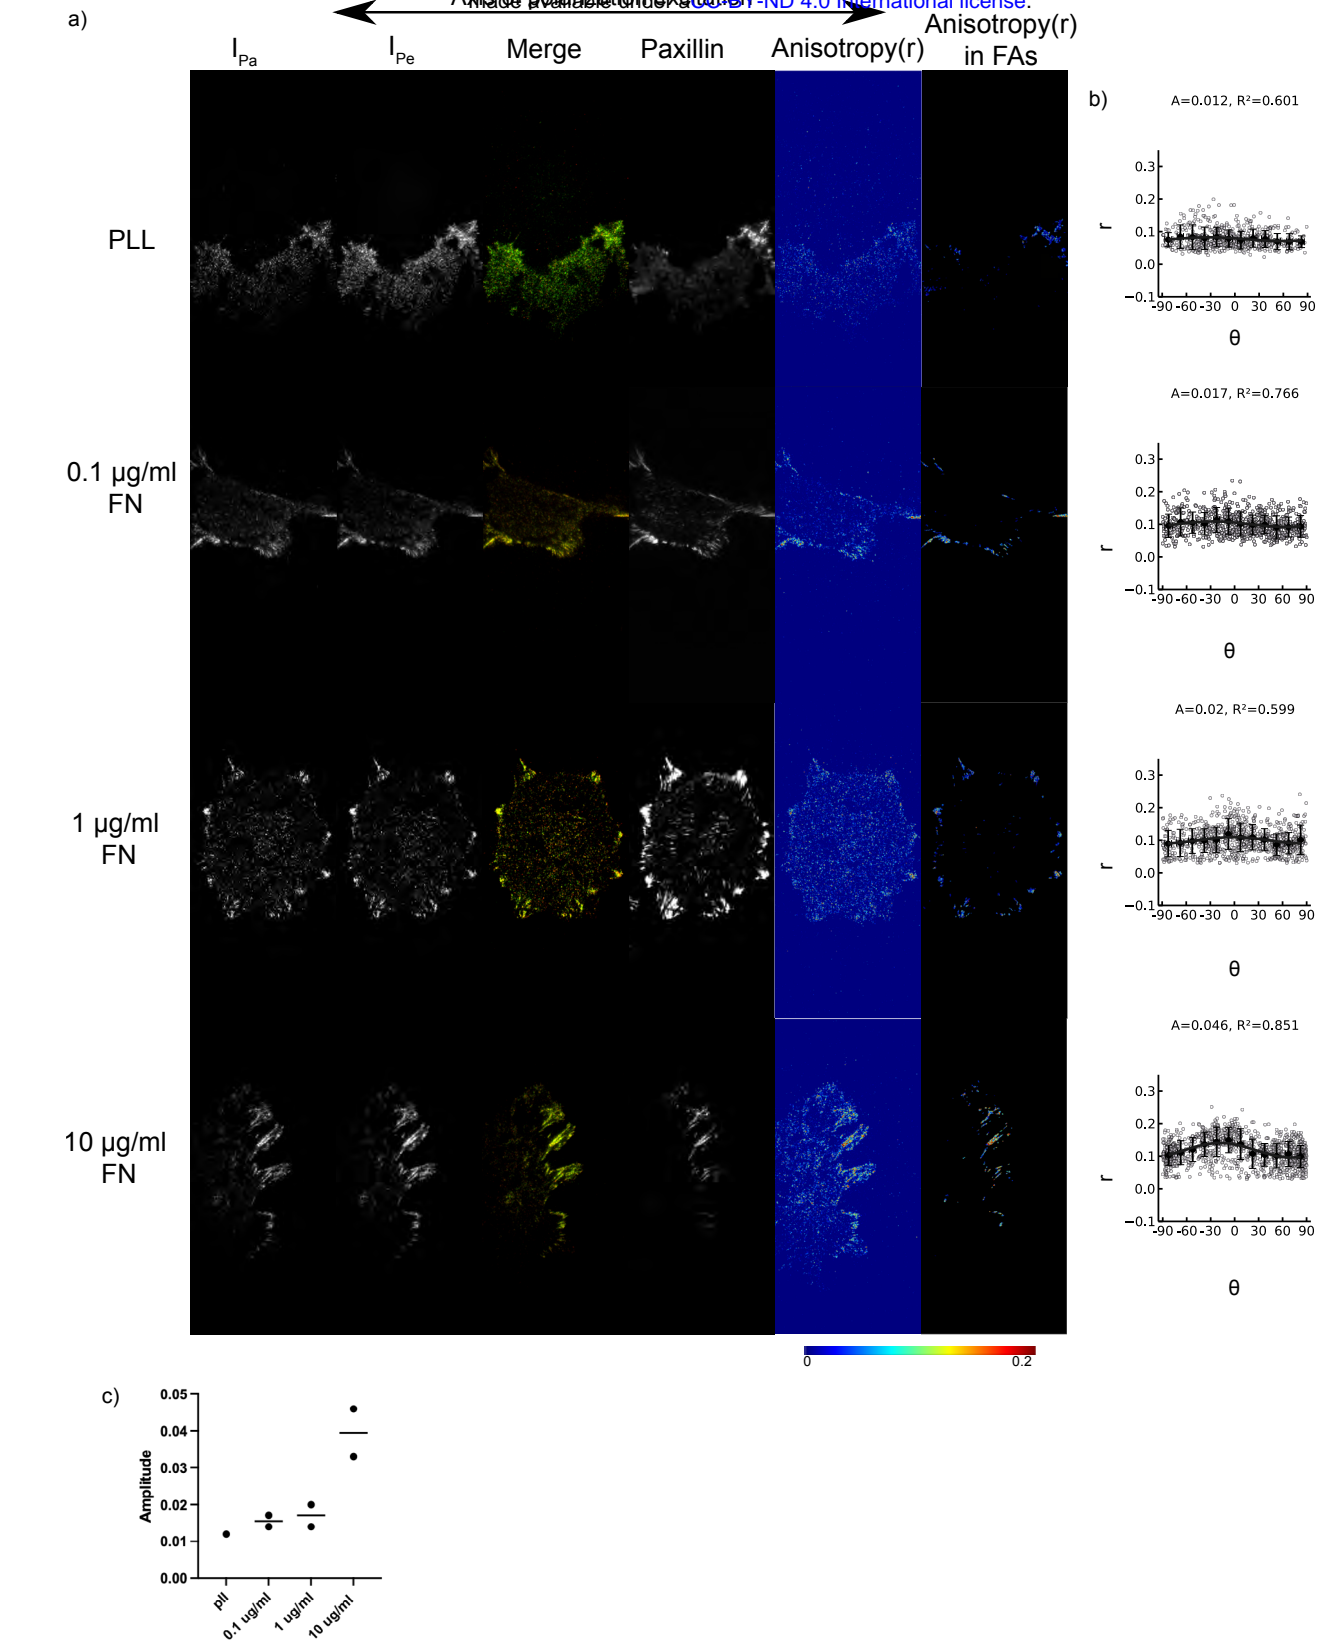

**Figure S4**

(a) Representative images of aV-integrin-GFP transfected MEFs plated on glass coated with PLL and different FN concentrations (0.1 $\mu\text{g/ml}$ , 1 $\mu\text{g/ml}$  10 $\mu\text{g/ml}$ ) imaged with TIRF. Emission from the parallel ( $I_{Pa}$ ) and perpendicular ( $I_{Pe}$ ) channels and merge are shown (left  $I_{Pa}$  magenta,  $I_{Pe}$  green). Paxillin stained with Alexa 568 (middle). Emission anisotropy (r) of actin stained with aV-integrin-GFP in the whole cell and in the FAs are shown (right). Magnitude of anisotropy color scale (bottom) (b) mean integrin anisotropy (r) in FAs vs FA orientation fit to the cos2 function  $r = C + A \cdot \cos^2(\gamma + \theta d)$  for cells plated on each PLL/FN condition. Error bars represent SD. N = 15 for each experiment. (c) graph of integrin anisotropy amplitudes of cells on different FN concentrations (0.1 $\mu\text{g/ml}$ , 1 $\mu\text{g/ml}$  10 $\mu\text{g/ml}$ ) from two experiments. PLL experiments were done once. N = 19, 80, 35, 26 for the conditions PLL, 0.1 $\mu\text{g/ml}$  FN, 1 $\mu\text{g/ml}$ FN, 10 $\mu\text{g/ml}$  FN respectively.

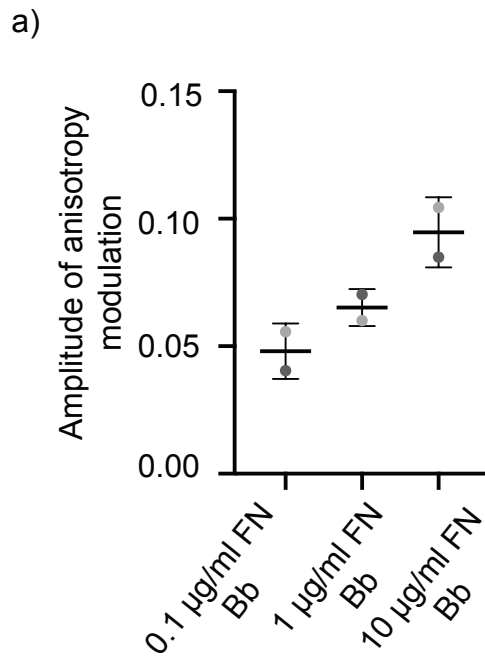

**Figure S5**

(a) Graph showing amplitudes of actin anisotropy ( $r$ ) of cells plated on glass coated with different FN concentrations (0.1  $\mu\text{g/ml}$ , 1 $\mu\text{g/ml}$ , 10 $\mu\text{g/ml}$ ) following blebbistatin washout.  $N = 15$  for each condition per experiment.



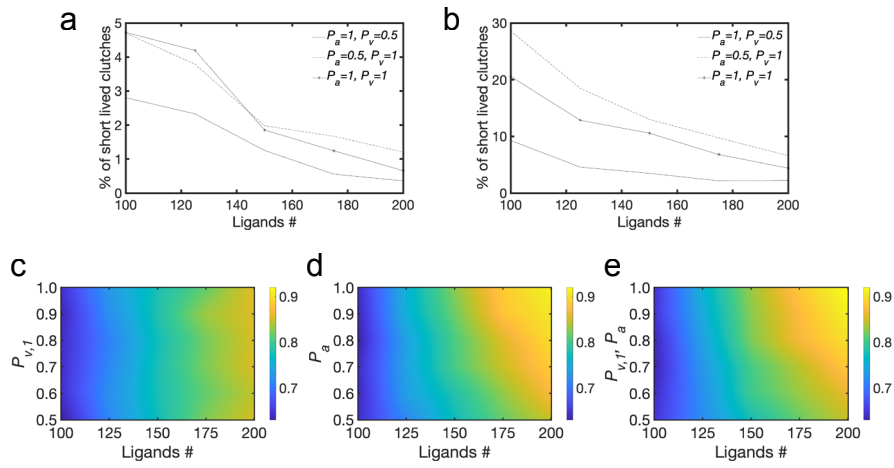

**Figure S6**

(a) Average percentage of short lived clutches (with lifetime  $< 0.9$  s) relative to the total amount of ligated clutches for different conditions of  $P_a$  and  $P_{v,1}$  using 100 to 200 ligands/ $\mu\text{m}^2$  and  $Y = 6$  KPa or (b)  $Y = 1$  KPa. (c-e) Average fraction of ligated clutches, using  $Y = 1$  KPa and varying  $n$  between 100-200 ligands/ $\mu\text{m}^2$  and either (c) varying  $P_{v,1}$  between 0.5-1 while keeping  $P_a = 0.5$ ; (d) varying  $P_a$  between 0.5-1 while keeping  $P_{v,1} = 0.5$ ; (e) simultaneously varying  $P_{v,1}$  and  $P_a$  between 0.5-1. All data are obtained as averages from 300 s of simulations for each condition

## Supplementary Note on Computational model

We used a Brownian Dynamics approach to simulate the binding and unbinding of molecular adhesion clutches in response to differences in actin filaments orientations, ligand density and substrate stiffness. Actin filaments were considered implicitly in the model, by modulating the amount of force they exerted on the ligand-bound clutches depending on the number of engaged clutches and molecular motors. Therefore, force on the clutches depended on the actin flow rate, which in turn depended on the number of ligand-bound clutches, substrate rigidity and the number of motors. Unbinding of the clutches could follow two pathways: the directional and the non-directional bond kinetics of vinculin. To simulate different degrees of orientation of the actin filaments, we modulated the probability of establishing a directional versus a non-directional catch bond for the interaction of the clutch with actin.

### Computational Domain and Boundary Conditions.

Like our previous implementation of the adhesion assembly model[1], [2], the computational domain was 3D and consisted of two parallel surfaces of 1  $\mu\text{m}$  side, separated in the vertical direction by  $L=20$  nm, a dimension typical of integrin headpiece extension[3]. The bottom surface represented the substrate with immobilized ligands; the top substrate represented the ventral cell membrane with the clutches on it (Figure 5b). The clutches were initially randomly distributed on the top surface, and they diffused along  $x$  and  $y$ , with diffusion coefficient of integrin,  $D = 0.29 \mu\text{m}^2/\text{s}$ [4]. To avoid finite size effects on the motion of the free clutches, we used periodic boundary conditions in the lateral directions of the domain.

### Substrate Model.

The substrate was considered an elastic solid, consisting of a randomly distributed ideal linear springs, mimicking individual fibronectin molecules, with stiffness depending on substrate rigidity, as:

$$k_{sub} = \frac{YA}{L}$$

where  $Y$  is the Young's modulus (we tested values in the range 0.4– 60 kPa),  $A$  is the integrin/ligand cross-sectional area (corresponding to  $80 \text{ nm}^2$ , from an ideal bar of radius  $\sim 5$  nm, corresponding to approximately half the value of the transmembrane leg separation of an integrin in the open conformation), and  $L$  is the equilibrium distance separation between substrate and top layer, corresponding to the equilibrium separation between clutch and bound ligand.

Hooke's law for each spring in the bundle can be written as:

$$F_{sub} = k_{sub}\Delta L$$

where  $\Delta L$  is the variation from the equilibrium separation between clutch and bound ligand. We used ligand densities between 100-200 ligands/ $\mu\text{m}^2$ .

### Actin flow.

Actin was considered implicitly, as a force acting on each ligated clutch, as a function of the flow velocity. It was calculated as:

$$\mathbf{F}_{flow} = \zeta_i \mathbf{v}_{flow}$$

The actin retrograde flow velocity ( $\mathbf{v}_{flow}$ ) was calculated through the linear force-velocity relationship [5], [6],:

$$\mathbf{v}_{flow} = \mathbf{v}_u \left(1 - \frac{x_c k_{sub}}{n_m F_m}\right)$$

where  $\mathbf{v}_u = 0.11 \mu\text{m/s}$  is the unloaded velocity,  $x_c$  is the number of bound clutches,  $n_m = 135$  is the number of motors, and  $F_m = 2 \text{ pN}$  is the motor stall force.

### Clutch Representation

Each  $i$ -th clutch and  $j$ -th ligand was defined by a 3D position vectors,  $\mathbf{r}_i$  and  $\mathbf{r}_j$ , respectively. The vector  $\mathbf{r}_i$  presented  $x$ ,  $y$ , and  $z$  coordinates of the  $i$ -th clutch; the vector  $\mathbf{r}_j$  presented  $x$ ,  $y$  and  $z$  coordinates of the  $j$ -th ligand. At every timestep of the simulations,  $x$  and  $y$  of  $\mathbf{r}_i$  were updated to track the clutch displacement on the top surface, and binding/unbinding of substrate ligands, while  $z$  remained fixed at 0;  $x$ ,  $y$ , and  $z$  of  $\mathbf{r}_j$  remained all fixed over the course of the simulations because ligands were immobilized, with  $z = -0.02 \mu\text{m}$ .

When a free, diffusive clutch came in proximity of a free ligand ( $< 21 \text{ nm}$  from it), it bound the ligand by establishing a harmonic interaction. This interaction presented spring constant  $k_{sub}$  (proportional to the substrate Young's modulus,  $Y$ ), and equilibrium distance  $L$ , corresponding to the separation of the open extracellular integrin headpiece from the membrane [3]. In the ligated state, a number of vinculin-actin bonds were also formed. This number dependent on the force on the integrin-fibronectin bond: 2 for forces below 8 pN; 5 for forces between 8 and 15 pN; 9 for forces between 15 and 21 pN; 11 for forces  $> 21 \text{ pN}$  [7]. The harmonic interactions between clutches and ligands, and between vinculins and actin provided several mechanical links between actin and the substrate. Each of these links lasted for a certain lifetime, that depended on two types of catch-slip bonds (integrin-ligand and vinculin-actin bonds). Each clutch became unligated if integrin and all vinculins failed. Once the clutches unbound their ligands, they became diffusive again until they bound a new ligand.

### Implementation Algorithm.

Recognizing that inertia is negligible on the length and time scales of integrin motion in the plasma membrane, the displacement of each  $i$ -th integrin was governed by the Langevin equation of motion in the limit of high friction [8]

$$\frac{d\mathbf{r}_i}{dt} = \frac{\mathbf{F}_i}{\zeta_i}$$

where  $\mathbf{r}_i$  was the position vector of integrin;  $\zeta_i$  was integrin friction coefficient calculated using Einstein relation, as  $\zeta_i = \frac{k_B T}{D} = 0.0142 \text{ pN s}/\mu\text{m}$ , where  $k_B T = 4.11 \text{ pN nm}$  and  $D = 0.29 \mu\text{m}^2/\text{s}$ ;  $dt = 10^{-4} \text{ s}$  was the simulation timestep;  $\mathbf{F}_i$  was the total force on the clutch, including a stochastic

contribution from thermal effects and a deterministic contribution from actin flow, governed by amount of ligated clutches, number of motors and their stall force, and substrate mechanics.

Considering all forces acting on the clutches at every time step, their positions were updated iteratively using an explicit Euler integration scheme:

$$\mathbf{r}_i(t + dt) = \mathbf{r}_i(t) + \frac{d\mathbf{r}_i}{dt} dt = \mathbf{r}_i(t) + \frac{\mathbf{F}_i}{\zeta_i} dt$$

### Forces acting on the clutches

The total force acting on each  $i$ -th clutch,  $\mathbf{F}_i$ , resulted from the sum of a stochastic and a deterministic contribution. A stochastic force,  $\mathbf{F}_T$ , was applied to all clutches in the membrane at every  $dt$ , to mimic thermal effects generating diffusion. This force satisfied the fluctuation-dissipation theorem. Deterministic forces originated from actin flow,  $\mathbf{F}_{flow}$ , and substrate tension,  $\mathbf{F}_{sub}$ . Thus, the total force acting on each  $i$ -th clutch was calculated as:

$$\mathbf{F}_i = \mathbf{F}_T + \mathbf{F}_{flow} + \mathbf{F}_{sub}$$

### Lifetime of clutch engagements depends on force

The clutch/substrate interaction persisted for a characteristic lifetime which depended upon the tension on the bond. We assumed that integrin and vinculin feel the effect of this force equally on the clutch bond and that the force increases the dissociation rate constants ( $k_{off,integrin}$ ,  $k_{off,+}$ ,  $k_{off,-}$ ) as originally proposed by Bell [9].

Two characteristic catch bonds were considered: integrin-fibronectin and vinculin-actin. The clutch/substrate interaction broke when both bonds were broken (for the case of vinculin, all vinculin bonds had to break for the clutch to become unligated).

A double exponential pathway determined unbinding rates of integrin-fibronectin and of each vinculin-actin. It included a strengthening pathway, with a negative exponent, and a weakening pathway, with a positive exponent.

For integrin, the unbinding rate was:

$$k_{off} = 2 * e^{-0.0640 * F} + 0.00005 * e^{0.26 * F}$$

For each vinculin, the unbinding rate depended on filaments orientation and therefore it depended on the direction of force application. For forces applied toward the filament pointed end, the catch bond was directional, with the longest lifetimes and corresponding unbinding rate:

$$k_{off,-} = 2 * e^{-0.046 * F} + 0.00005 * e^{0.78 * F}$$

For forces applied toward the filament barbed end, the catch bond was non-directional, and the unbinding rate was:

$$k_{off,+} = 4 * e^{-0.28 * F} + 0.00005 * e^{0.95 * F}$$



## References

- [1] T. C. Bidone, A. v. Skeeters, P. W. Oakes, and G. A. Voth, “Multiscale model of integrin adhesion assembly,” *PLOS Computational Biology*, vol. 15, no. 6, p. e1007077, Jun. 2019, doi: 10.1371/JOURNAL.PCBI.1007077.
- [2] P. W. Oakes *et al.*, “Lamellipodium is a myosin-independent mechanosensor,” *Proc Natl Acad Sci U S A*, vol. 115, no. 11, pp. 2646–2651, 2018, doi: 10.1073/PNAS.1715869115/SUPPL\_FILE/PNAS.1715869115.SM03.MP4.
- [3] X. P. Xu, E. Kim, M. Swift, J. W. Smith, N. Volkmann, and D. Hanein, “Three-Dimensional Structures of Full-Length, Membrane-Embedded Human  $\alpha$ (IIb) $\beta$ (3) Integrin Complexes,” *Biophys J*, vol. 110, no. 4, pp. 798–809, Feb. 2016, doi: 10.1016/J.BPJ.2016.01.016.
- [4] O. Rossier *et al.*, “Integrins  $\beta$ 1 and  $\beta$ 3 exhibit distinct dynamic nanoscale organizations inside focal adhesions,” *Nature Cell Biology*, vol. 14, no. 10, pp. 1057–1067, 2012, doi: 10.1038/ncb2588.
- [5] B. L. Bangasser and D. J. Odde, “Master equation-based analysis of a motor-clutch model for cell traction force,” *Cellular and Molecular Bioengineering*, vol. 6, no. 4, pp. 449–459, Dec. 2013, doi: 10.1007/s12195-013-0296-5.
- [6] C. E. Chan and D. J. Odde, “Traction dynamics of filopodia on compliant substrates,” *Science (1979)*, vol. 322, no. 5908, pp. 1687–1691, Dec. 2008, doi: 10.1126/science.1163595.
- [7] M. Yao *et al.*, “The mechanical response of talin,” *Nature Communications 2016 7:1*, vol. 7, no. 1, pp. 1–11, Jul. 2016, doi: 10.1038/ncomms11966.
- [8] D. Feldman, “The theory of polymer dynamics, by M. Doi and S. F. Edwards, the Clarendon Press, Oxford University Press, New York, 1986, 391 pp. Price: \$78.50.,” *Journal of Polymer Science Part C: Polymer Letters*, vol. 27, no. 7, pp. 239–240, Jun. 1989, doi: 10.1002/POL.1989.140270706.
- [9] George I. Bell, “Models for the Specific Adhesion of Cells to Cells,” *Science (1979)*, vol. 200, no. 4342, pp. 618–627, 1978, doi: 10.1126/science.347575.
